# Supplementary material for: The DNA-PAINT palette: a comprehensive performance analysis of fluorescent dyes
Source: Springer Nature journal article supplement (doi:10.1038/s41592-024-02374-8), 2024-08-07
Supplement: MOESM1 [file 41592_2024_2374_MOESM1_ESM.pdf]

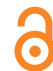

---

# The DNA-PAINT palette: a comprehensive performance analysis of fluorescent dyes

---

In the format provided by the authors and unedited

---

## Supplementary Information

### The DNA-PAINT palette: A comprehensive performance analysis of fluorescent dyes

Philipp R. Steen<sup>1,2</sup>, Eduard M. Unterauer<sup>1,2</sup>, Luciano A. Masullo<sup>2</sup>, Jisoo Kwon<sup>2</sup>, Ana Perovic<sup>2</sup>, Kristina Jevdokimenko<sup>3</sup>, Felipe Opazo<sup>3,4,5</sup>, Eugenio F. Fornasiero<sup>3,6</sup>, and Ralf Jungmann<sup>1,2</sup>

<sup>1</sup>Faculty of Physics and Center for Nanoscience, Ludwig Maximilian University, Munich, Germany. <sup>2</sup>Max Planck Institute of Biochemistry, Martinsried, Germany. <sup>3</sup>Institute of Neuro- and Sensory Physiology, University Medical Center Göttingen, Göttingen, Germany. <sup>4</sup>Center for Biostructural Imaging of Neurodegeneration (BIN), University Medical Center Göttingen, Göttingen, Germany. <sup>5</sup>NanoTag Biotechnologies GmbH, Göttingen, Germany.

<sup>6</sup>Department of Life Sciences, University of Trieste, Trieste, Italy. Correspondence should be addressed to R.J. (jungmann@biochem.mpg.de).

|                                |                                  |
|--------------------------------|----------------------------------|
| <b>Supplementary Figure 1</b>  | Dye analysis, Alexa Fluor 488    |
| <b>Supplementary Figure 2</b>  | Dye analysis, Abberior Star 488  |
| <b>Supplementary Figure 3</b>  | Dye analysis, Atto488            |
| <b>Supplementary Figure 4</b>  | Dye analysis, CF488A             |
| <b>Supplementary Figure 5</b>  | Dye analysis, Atto565            |
| <b>Supplementary Figure 6</b>  | Dye analysis, CF568              |
| <b>Supplementary Figure 7</b>  | Dye analysis, Cy3B               |
| <b>Supplementary Figure 8</b>  | Dye analysis, Janelia Fluor 585  |
| <b>Supplementary Figure 9</b>  | Dye analysis, Alexa Fluor 647    |
| <b>Supplementary Figure 10</b> | Dye analysis, Abberior Star 635p |
| <b>Supplementary Figure 11</b> | Dye analysis, Atto643            |
| <b>Supplementary Figure 12</b> | Dye analysis, Atto647N           |
| <b>Supplementary Figure 13</b> | Dye analysis, Atto655            |
| <b>Supplementary Figure 14</b> | Dye analysis, CF640R             |
| <b>Supplementary Figure 15</b> | Dye analysis, CF660R             |
| <b>Supplementary Figure 16</b> | Dye analysis, Cy5                |
| <b>Supplementary Figure 17</b> | Dye analysis, Cy5B               |
| <b>Supplementary Figure 18</b> | Dye analysis, Janelia Fluor 646  |
| <b>Supplementary Table 1</b>   | Imaging Parameters               |
| <b>Supplementary Table 2</b>   | Sequences                        |
| <b>Supplementary Table 3</b>   | Antibodies                       |
| <b>Supplementary Table 4</b>   | Cross-talk in 3-channel imaging  |
| <b>Supplementary Table 5</b>   | DNA origami scaffold sequence    |

**Supplementary Figs. 1-18 | Dye analysis.** **a**, Absorption (grey) and emission (black) spectra with QY where available. **b**, Achievable precision illustrated by 20 nm DNA origami. **c**, Emission photon distribution and mean number of photons ( $\bar{N}$ ) per 100 ms. **d**, Bright time distribution and mean bright time ( $\bar{\tau}_b$ ). **e**, Dye stability expressed as localizations over time (per 20 seconds per docking site) over the course of the measurement. **f**, Mean DNA origami-based dye analysis results for all tested buffer conditions. Spectra, quantum yields (QY) where available and extinction coefficients from respective manufacturers. Uncertainties represent s.d. from 3 repeat measurements. **g**, Representative NPC (Nup96 labeled) illustrating achievable resolution in 3D, in cells. Left: top view, right: side view. **h**, Emission photon distribution. **i**, Comparison of representative nuclear (left) vs. cytoplasmic (right) localizations. **j**, Mean dye analysis results for cellular experiments. Uncertainties represent s.d. from 3 repeat measurements.

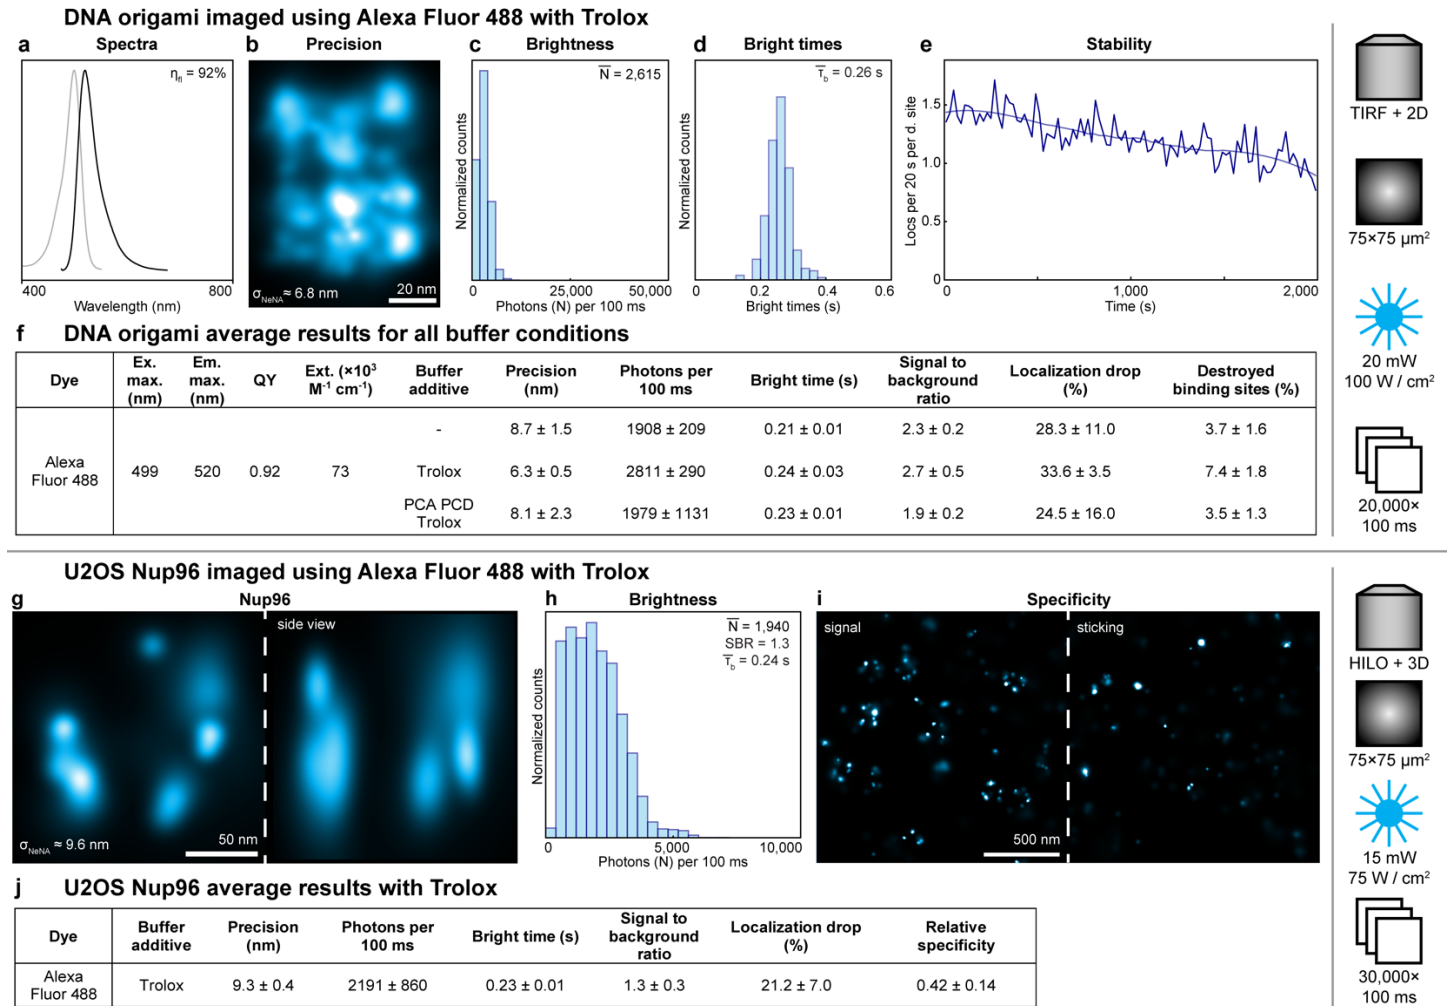

**Supplementary Figure 1 | Dye analysis, Alexa Fluor 488**

### DNA origami imaged using Abberior Star 488 with Trolox

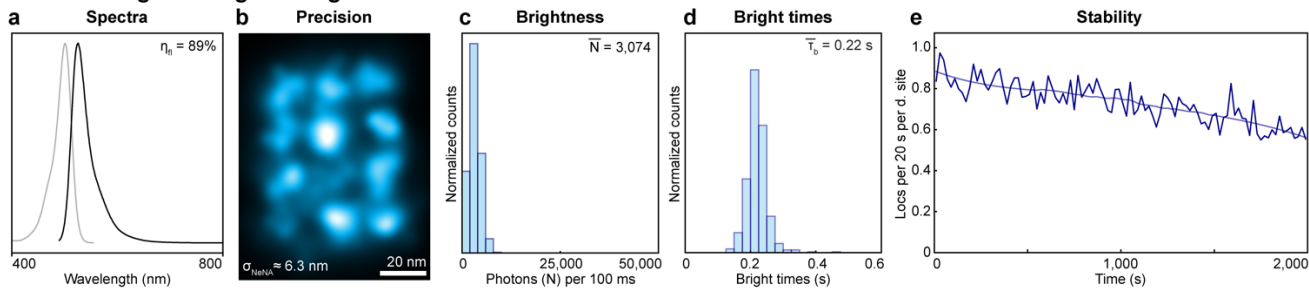

### f DNA origami average results for all buffer conditions

| Dye               | Ex. max. (nm) | Em. max. (nm) | QY   | Ext. ( $\times 10^3 \text{ M}^{-1} \text{ cm}^{-1}$ ) | Buffer additive | Precision (nm) | Photons per 100 ms | Bright time (s) | Signal to background ratio | Localization drop (%) | Destroyed binding sites (%) |
|-------------------|---------------|---------------|------|-------------------------------------------------------|-----------------|----------------|--------------------|-----------------|----------------------------|-----------------------|-----------------------------|
| Abberior Star 488 | 503           | 524           | 0.89 | 65                                                    | -               | $7.8 \pm 0.0$  | $1874 \pm 137$     | $0.17 \pm 0.00$ | $2.0 \pm 0.6$              | $28.2 \pm 19.1$       | $8.7 \pm 6.4$               |
|                   |               |               |      |                                                       | Trolox          | $6.3 \pm 0.6$  | $2969 \pm 365$     | $0.21 \pm 0.02$ | $2.7 \pm 0.7$              | $27.6 \pm 4.5$        | $9.1 \pm 2.7$               |
|                   |               |               |      |                                                       | PCA PCD Trolox  | $8.9 \pm 2.7$  | $2317 \pm 910$     | $0.22 \pm 0.00$ | $1.9 \pm 0.2$              | 8.3 CI (0.0, 20.0)    | $3.2 \pm 0.0$               |

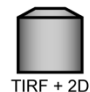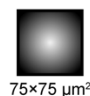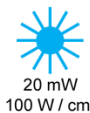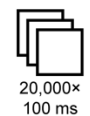

### U2OS Nup96 imaged using Abberior Star 488 with Trolox

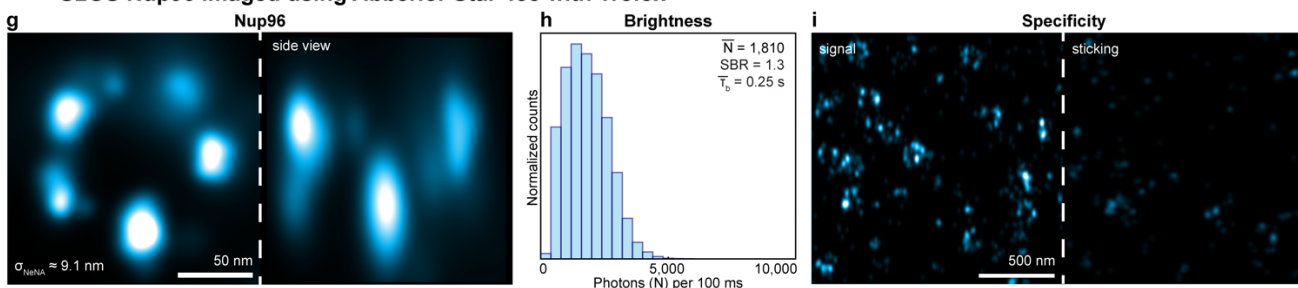

### j U2OS Nup96 average results with Trolox

| Dye               | Buffer additive | Precision (nm) | Photons per 100 ms | Bright time (s) | Signal to background ratio | Localization drop (%) | Relative specificity |
|-------------------|-----------------|----------------|--------------------|-----------------|----------------------------|-----------------------|----------------------|
| Abberior Star 488 | Trolox          | $11.5 \pm 2.9$ | $1532 \pm 274$     | $0.23 \pm 0.03$ | $1.0 \pm 0.2$              | $11.4 \pm 10.5$       | $0.55 \pm 0.11$      |

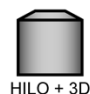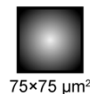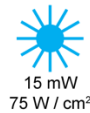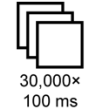

Supplementary Figure 2 | Dye analysis, Abberior Star 488

### DNA origami imaged using Atto488 with Trolox

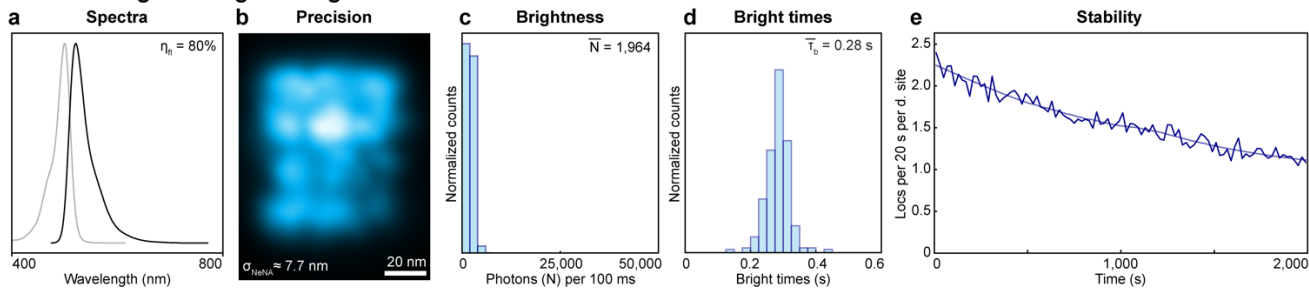

### f DNA origami average results for all buffer conditions

| Dye     | Ex. max. (nm) | Em. max. (nm) | QY  | Ext. ( $\times 10^3 \text{ M}^{-1} \text{ cm}^{-1}$ ) | Buffer additive | Precision (nm) | Photons per 100 ms | Bright time (s) | Signal to background ratio | Localization drop (%) | Destroyed binding sites (%) |
|---------|---------------|---------------|-----|-------------------------------------------------------|-----------------|----------------|--------------------|-----------------|----------------------------|-----------------------|-----------------------------|
| Atto488 | 500           | 520           | 0.8 | 90                                                    | -               | $8.7 \pm 0.8$  | $1849 \pm 465$     | $0.22 \pm 0.01$ | $1.4 \pm 0.1$              | $48.3 \pm 8.6$        | $19.3 \pm 0.6$              |
|         |               |               |     |                                                       | Trolox          | $7.4 \pm 0.3$  | $2073 \pm 249$     | $0.27 \pm 0.02$ | $1.6 \pm 0.2$              | $44.3 \pm 2.8$        | $17.1 \pm 3.6$              |
|         |               |               |     |                                                       | PCA PCD Trolox  | $8.4 \pm 0.2$  | $1804 \pm 264$     | $0.27 \pm 0.00$ | $1.4 \pm 0.2$              | $16.4 \pm 8.3$        | $9.2 \pm 0.3$               |

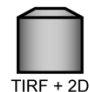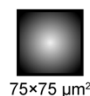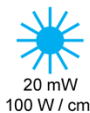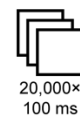

### U2OS Nup96 imaged using Atto488 with Trolox

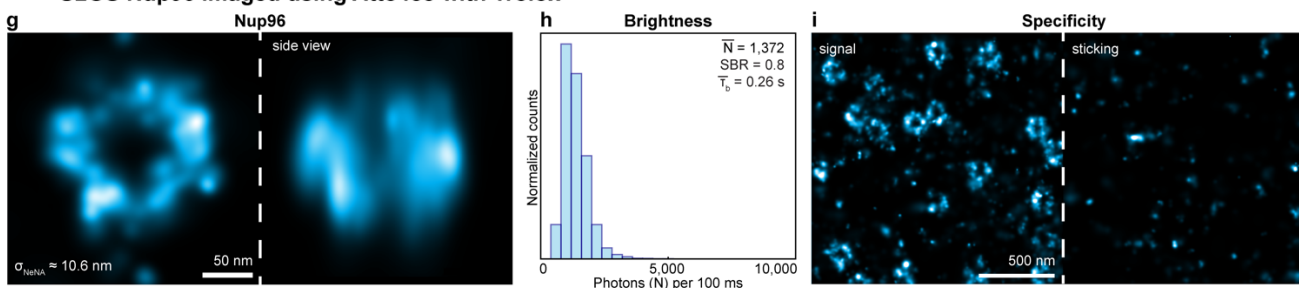

### j U2OS Nup96 average results with Trolox

| Dye     | Buffer additive | Precision (nm) | Photons per 100 ms | Bright time (s) | Signal to background ratio | Localization drop (%) | Relative specificity |
|---------|-----------------|----------------|--------------------|-----------------|----------------------------|-----------------------|----------------------|
| Atto488 | Trolox          | $11.4 \pm 1.4$ | $1388 \pm 181$     | $0.26 \pm 0.00$ | $0.8 \pm 0.1$              | $16.4 \pm 3.5$        | $0.71 \pm 0.19$      |

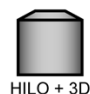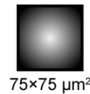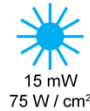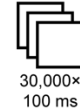

Supplementary Figure 3 | Dye analysis, Atto488

### DNA origami imaged using CF488A with Trolox

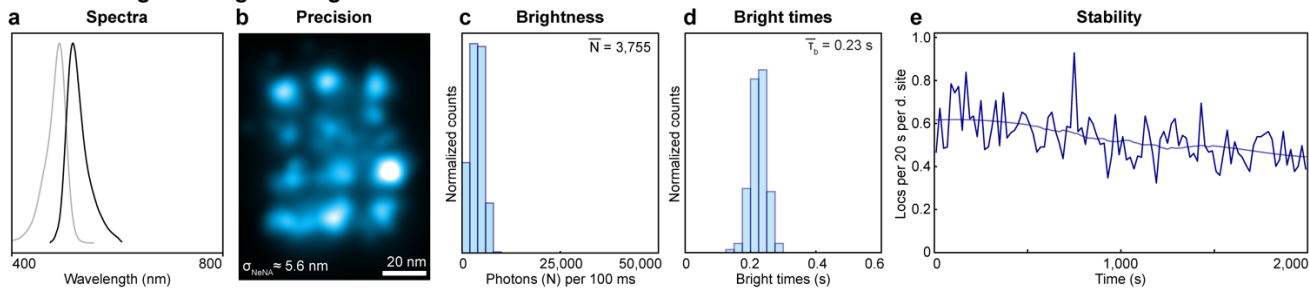

### f DNA origami average results for all buffer conditions

| Dye    | Ex. max. (nm) | Em. max. (nm) | QY | Ext. ( $\times 10^3 \text{ M}^{-1} \text{ cm}^{-1}$ ) | Buffer additive | Precision (nm) | Photons per 100 ms | Bright time (s) | Signal to background ratio | Localization drop (%) | Destroyed binding sites (%) |
|--------|---------------|---------------|----|-------------------------------------------------------|-----------------|----------------|--------------------|-----------------|----------------------------|-----------------------|-----------------------------|
| CF488A | 490           | 515           | -  | 70                                                    | -               | $6.9 \pm 0.8$  | $2492 \pm 578$     | $0.16 \pm 0.00$ | $2.0 \pm 0.2$              | $32.0 \pm 0.4$        | $8.9 \pm 2.8$               |
|        |               |               |    |                                                       | Trolox          | $5.4 \pm 0.6$  | $3879 \pm 732$     | $0.20 \pm 0.03$ | $3.2 \pm 0.8$              | $33.7 \pm 10.4$       | $8.3 \pm 3.6$               |
|        |               |               |    |                                                       | PCA PCD Trolox  | $5.9 \pm 0.8$  | $3901 \pm 412$     | $0.22 \pm 0.00$ | $2.5 \pm 0.0$              | $11.2 \pm 5.9$        | $5.4 \pm 2.1$               |

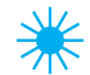

20 mW  
100 W / cm<sup>2</sup>

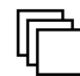

20,000×  
100 ms

### U2OS Nup96 imaged using CF488A with Trolox

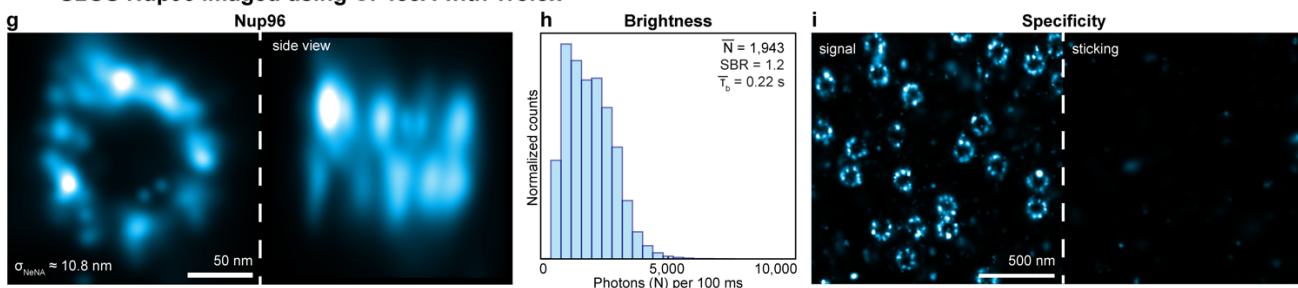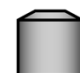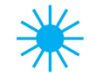

15 mW  
75 W / cm<sup>2</sup>

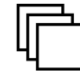

30,000×  
100 ms

### j U2OS Nup96 average results with Trolox

| Dye    | Buffer additive | Precision (nm) | Photons per 100 ms | Bright time (s) | Signal to background ratio | Localization drop (%) | Relative specificity |
|--------|-----------------|----------------|--------------------|-----------------|----------------------------|-----------------------|----------------------|
| CF488A | Trolox          | $10.7 \pm 0.1$ | $2240 \pm 305$     | $0.21 \pm 0.01$ | $1.3 \pm 0.1$              | $15.5 \pm 7.4$        | $0.48 \pm 0.07$      |

Supplementary Figure 4 | Dye analysis, CF488A

### DNA origami imaged using Atto565 with Trolox

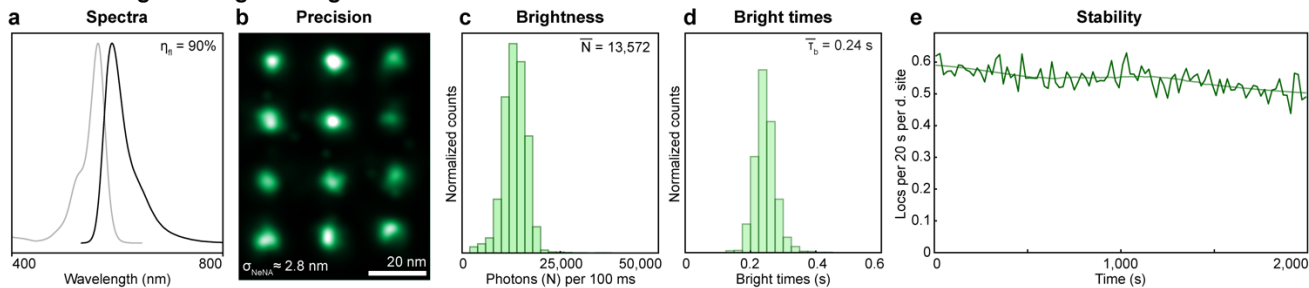

### f DNA origami average results for all buffer conditions

| Dye     | Ex. max. (nm) | Em. max. (nm) | QY  | Ext. ( $\times 10^3 \text{ M}^{-1} \text{ cm}^{-1}$ ) | Buffer additive | Precision (nm) | Photons per 100 ms | Bright time (s) | Signal to background ratio | Localization drop (%) | Destroyed binding sites (%) |
|---------|---------------|---------------|-----|-------------------------------------------------------|-----------------|----------------|--------------------|-----------------|----------------------------|-----------------------|-----------------------------|
| Atto565 | 564           | 590           | 0.9 | 120                                                   | -               | $3.2 \pm 0.2$  | $9804 \pm 1907$    | $0.24 \pm 0.01$ | $10.3 \pm 0.3$             | $18.8 \pm 4.0$        | $3.6 \pm 1.6$               |
|         |               |               |     |                                                       | Trolox          | $2.9 \pm 0.1$  | $11600 \pm 1896$   | $0.24 \pm 0.01$ | $11.1 \pm 2.8$             | $16.4 \pm 4.0$        | $1.3 \pm 0.5$               |
|         |               |               |     |                                                       | PCA PCD Trolox  | $3.3 \pm 0.2$  | $10295 \pm 3494$   | $0.23 \pm 0.01$ | $11.3 \pm 0.3$             | $12.1 \pm 0.7$        | $5.8 \pm 4.5$               |

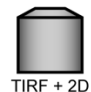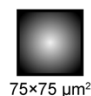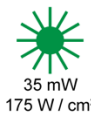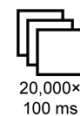

### U2OS Nup96 imaged using Atto565 with Trolox

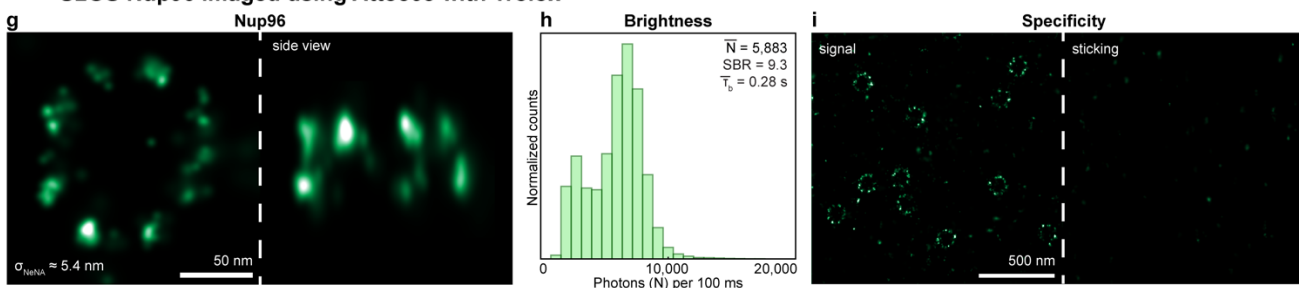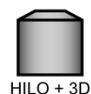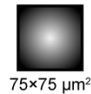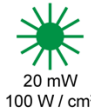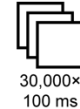

### j U2OS Nup96 average results with Trolox

| Dye     | Buffer additive | Precision (nm) | Photons per 100 ms | Bright time (s) | Signal to background ratio | Localization drop (%) | Relative specificity |
|---------|-----------------|----------------|--------------------|-----------------|----------------------------|-----------------------|----------------------|
| Atto565 | Trolox          | $6.0 \pm 0.6$  | $6287 \pm 917$     | $0.28 \pm 0.01$ | $8.4 \pm 0.9$              | 4.2 CI (0.0, 9.3)     | $0.87 \pm 0.39$      |

Supplementary Figure 5 | Dye analysis, Atto565

### DNA origami imaged using CF568

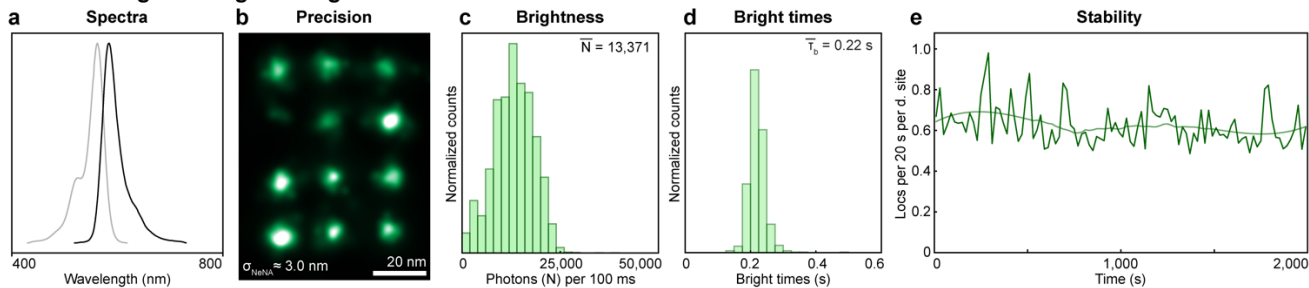

### f DNA origami average results for all buffer conditions

| Dye   | Ex. max. (nm) | Em. max. (nm) | QY | Ext. ( $\times 10^3 \text{ M}^{-1} \text{ cm}^{-1}$ ) | Buffer additive | Precision (nm) | Photons per 100 ms | Bright time (s) | Signal to background ratio | Localization drop (%) | Destroyed binding sites (%) |
|-------|---------------|---------------|----|-------------------------------------------------------|-----------------|----------------|--------------------|-----------------|----------------------------|-----------------------|-----------------------------|
| CF568 | 562           | 583           | -  | 100                                                   | -               | $3.0 \pm 0.2$  | $13388 \pm 2033$   | $0.21 \pm 0.01$ | $10.9 \pm 2.5$             | $11.5 \pm 1.1$        | $2.3 \pm 0.2$               |
|       |               |               |    |                                                       | Trolox          | $3.1 \pm 0.2$  | $14729 \pm 1465$   | $0.21 \pm 0.00$ | $13.6 \pm 0.7$             | 6.3 Cl (0.0, 10.0)    | 1.1 Cl (0.0, 2.4)           |
|       |               |               |    |                                                       | PCA PCD Trolox  | $3.8 \pm 0.3$  | $10456 \pm 264$    | $0.22 \pm 0.01$ | $10.8 \pm 1.4$             | $6.1 \pm 1.8$         | $1.4 \pm 0.8$               |

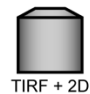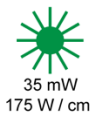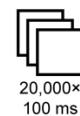

### U2OS Nup96 imaged using CF568

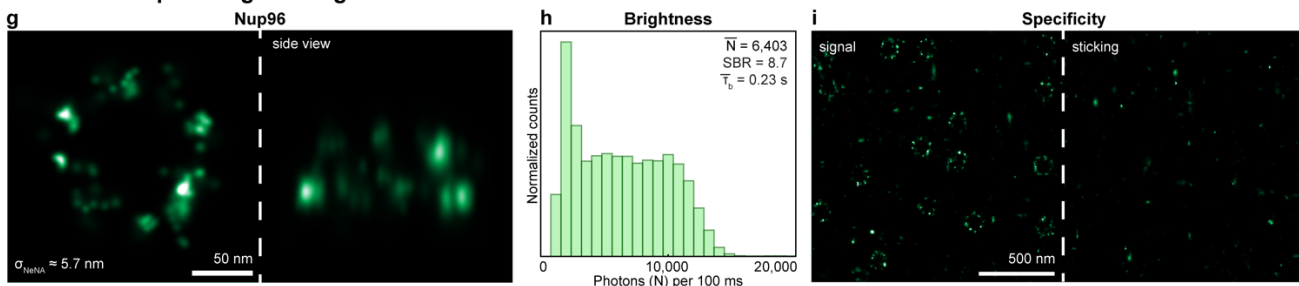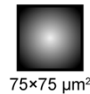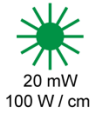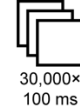

### j U2OS Nup96 average results

| Dye   | Buffer additive | Precision (nm) | Photons per 100 ms | Bright time (s) | Signal to background ratio | Localization drop (%) | Relative specificity |
|-------|-----------------|----------------|--------------------|-----------------|----------------------------|-----------------------|----------------------|
| CF568 | -               | $6.0 \pm 0.8$  | $6332 \pm 62$      | $0.24 \pm 0.02$ | $7.1 \pm 2.5$              | 2.4 Cl (0.0, 6.6)     | $0.51 \pm 0.21$      |

Supplementary Figure 6 | Dye analysis, CF568



DNA origami imaged using Cy3B with PCA / PCD / Trolox

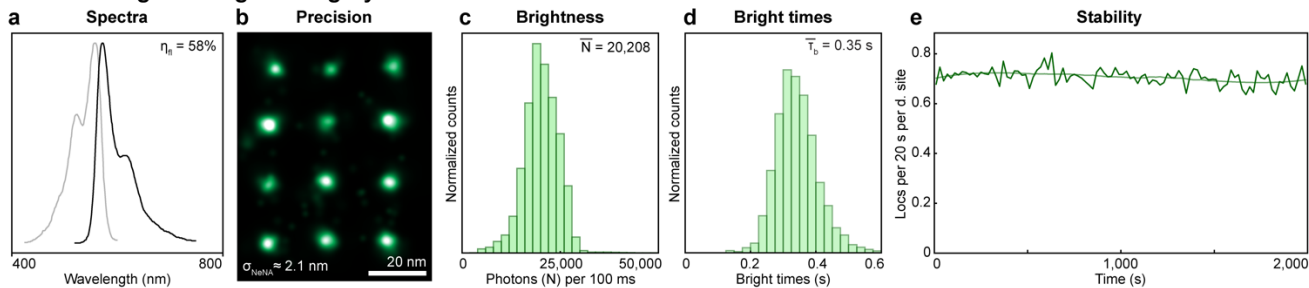

**f DNA origami average results for all buffer conditions**

| Dye  | Ex. max. (nm) | Em. max. (nm) | QY   | Ext. ( $\times 10^3 \text{ M}^{-1} \text{ cm}^{-1}$ ) | Buffer additive | Precision (nm) | Photons per 100 ms | Bright time (s) | Signal to background ratio | Localization drop (%) | Destroyed binding sites (%) |
|------|---------------|---------------|------|-------------------------------------------------------|-----------------|----------------|--------------------|-----------------|----------------------------|-----------------------|-----------------------------|
| Cy3B | 560           | 571           | 0.58 | 120                                                   | -               | $2.7 \pm 0.2$  | $15574 \pm 3716$   | $0.30 \pm 0.03$ | $14.8 \pm 2.5$             | $11.6 \pm 7.7$        | $2.1 \pm 1.2$               |
|      |               |               |      |                                                       | Trolox          | $2.3 \pm 0.2$  | $17653 \pm 4508$   | $0.33 \pm 0.04$ | $16.0 \pm 3.1$             | $4.0 \pm 3.9$         | $1.5 \pm 0.6$               |
|      |               |               |      |                                                       | PCA PCD Trolox  | $2.0 \pm 0.1$  | $23195 \pm 3323$   | $0.35 \pm 0.01$ | $14.3 \pm 2.6$             | $3.7 \pm 3.4$         | $2.1 \pm 0.3$               |

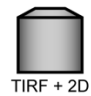

U2OS Nup96 imaged using Cy3B with PCA / PCD / Trolox

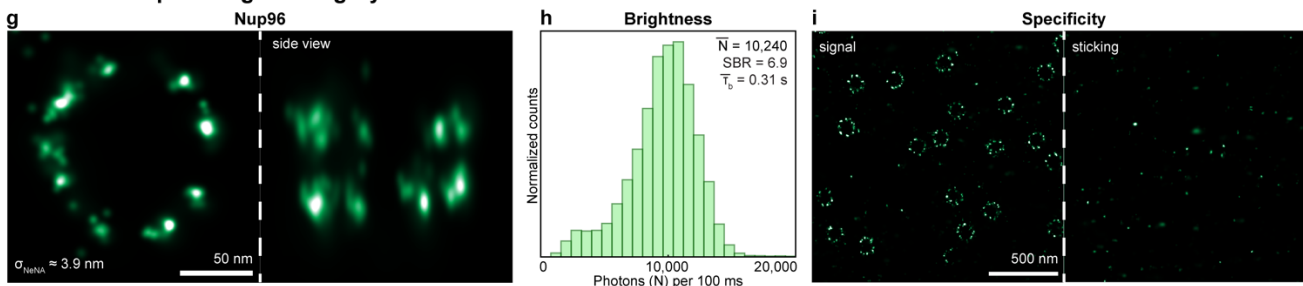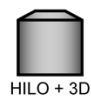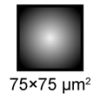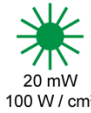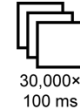

**j U2OS Nup96 average results with PCA / PCD / Trolox**

| Dye  | Buffer additive | Precision (nm) | Photons per 100 ms | Bright time (s) | Signal to background ratio | Localization drop (%) | Relative specificity |
|------|-----------------|----------------|--------------------|-----------------|----------------------------|-----------------------|----------------------|
| Cy3B | PCA PCD Trolox  | $4.5 \pm 0.4$  | $6991 \pm 2203$    | $0.34 \pm 0.03$ | $6.3 \pm 1.4$              | 4.9 CI (0.0, 14.3)    | $1.04 \pm 0.09$      |

Supplementary Figure 7 | Dye analysis, Cy3B

### DNA origami imaged using Janelia Fluor 585 with Trolox

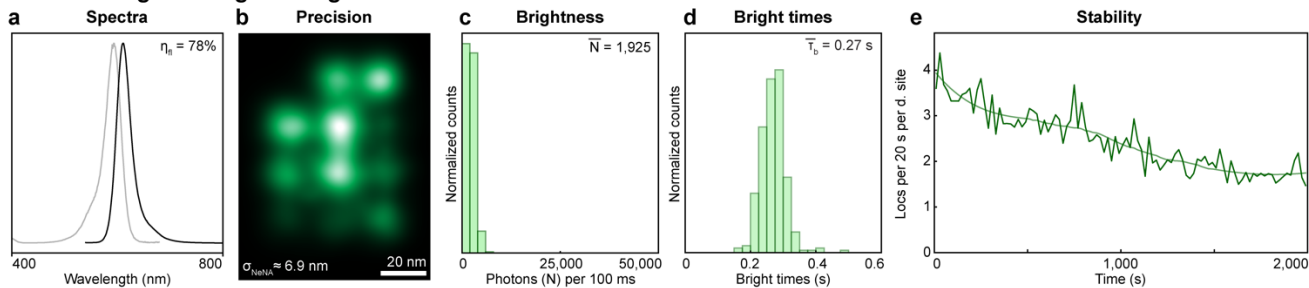

### f DNA origami average results for all buffer conditions

| Dye               | Ex. max. (nm) | Em. max. (nm) | QY   | Ext. ( $\times 10^3$ M <sup>-1</sup> cm <sup>-1</sup> ) | Buffer additive | Precision (nm) | Photons per 100 ms | Bright time (s) | Signal to background ratio | Localization drop (%) | Destroyed binding sites (%) |
|-------------------|---------------|---------------|------|---------------------------------------------------------|-----------------|----------------|--------------------|-----------------|----------------------------|-----------------------|-----------------------------|
| Janelia Fluor 585 | 585           | 609           | 0.78 | 156                                                     | -               | 7.6 ± 0.6      | 1791 ± 224         | 0.28 ± 0.01     | 3.5 ± 0.1                  | 30.5 CI (0.0, 62.9)   | 20.2 CI (0.0, 45.3)         |
|                   |               |               |      |                                                         | Trolox          | 6.9 ± 1.1      | 2429 ± 1137        | 0.26 ± 0.02     | 3.6 ± 0.3                  | 35.6 ± 28.7           | 17.7 ± 13.4                 |
|                   |               |               |      |                                                         | PCA PCD Trolox  | 8.5 ± 0.6      | 1715 ± 214         | 0.26 ± 0.00     | 3.3 ± 0.0                  | 10.2 CI (0.0, 24.5)   | 5.8 ± 4.5                   |

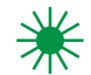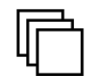

100 ms

### U2OS Nup96 imaged using Janelia Fluor 585 with Trolox

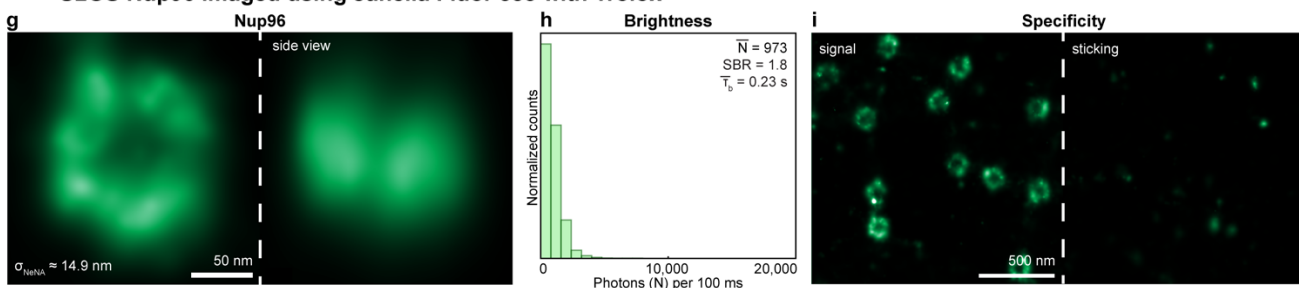

### j U2OS Nup96 average results

| Dye               | Buffer additive | Precision (nm) | Photons per 100 ms | Bright time (s) | Signal to background ratio | Localization drop (%) | Relative specificity |
|-------------------|-----------------|----------------|--------------------|-----------------|----------------------------|-----------------------|----------------------|
| Janelia Fluor 585 | Trolox          | 17.4 ± 2.5     | 741 ± 219          | 0.22 ± 0.01     | 1.0 ± 0.7                  | 8.8 CI (0.0, 19.6)    | 1.30 ± 0.47          |

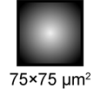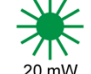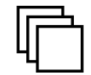

100 ms

Supplementary Figure 8 | Dye analysis, Janelia Fluor 585

### DNA origami imaged using Alexa Fluor 647 with PCA / PCD / Trolox

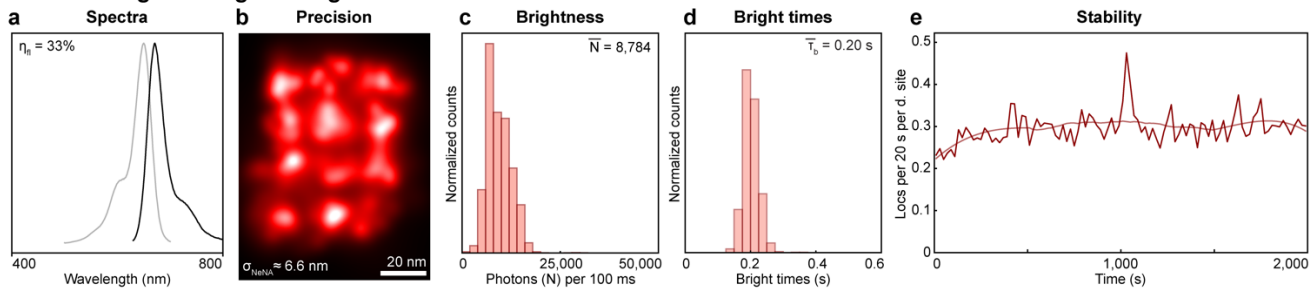

### f DNA origami average results for all buffer conditions

| Dye             | Ex. max. (nm) | Em. max. (nm) | QY   | Ext. ( $\times 10^3$ M <sup>-1</sup> cm <sup>-1</sup> ) | Buffer additive | Precision (nm) | Photons per 100 ms | Bright time (s) | Signal to background ratio | Localization drop (%) | Destroyed binding sites (%) |
|-----------------|---------------|---------------|------|---------------------------------------------------------|-----------------|----------------|--------------------|-----------------|----------------------------|-----------------------|-----------------------------|
| Alexa Fluor 647 | 650           | 671           | 0.33 | 270                                                     | -               | 10.0 ± 1.9     | 8928 ± 1015        | 0.18 ± 0.01     | 1.9 ± 0.3                  | 43.6 ± 20.3           | 15.6 ± 9.8                  |
|                 |               |               |      |                                                         | Trolox          | 9.5 ± 1.2      | 9293 ± 1622        | 0.18 ± 0.01     | 2.3 ± 0.0                  | 41.6 ± 17.3           | 12.1 ± 8.5                  |
|                 |               |               |      |                                                         | PCA PCD Trolox  | 6.3 ± 0.2      | 10348 ± 1358       | 0.19 ± 0.01     | 2.1 ± 0.2                  | 1.4 CI (0.0, 2.9)     | 1.2 ± 0.1                   |

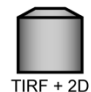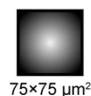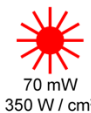

### U2OS Nup96 imaged using Alexa Fluor 647 with PCA / PCD / Trolox

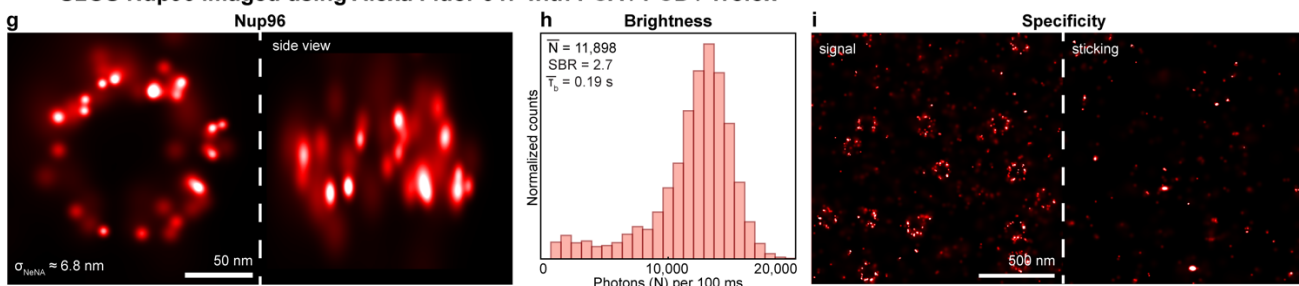

### j U2OS Nup96 average results with PCA / PCD / Trolox

| Dye             | Buffer additive | Precision (nm) | Photons per 100 ms | Bright time (s) | Signal to background ratio | Localization drop (%) | Relative specificity |
|-----------------|-----------------|----------------|--------------------|-----------------|----------------------------|-----------------------|----------------------|
| Alexa Fluor 647 | PCA PCD Trolox  | 8.9 ± 2.2      | 10213 ± 2592       | 0.19 ± 0.01     | 2.1 ± 0.9                  | 51.3 ± 5.2            | 0.69 ± 0.41          |

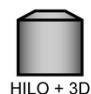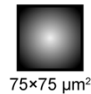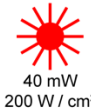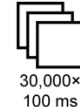

Supplementary Figure 9 | Dye analysis, Alexa Fluor 647

### DNA origami imaged using Abberior Star 635p with Trolox

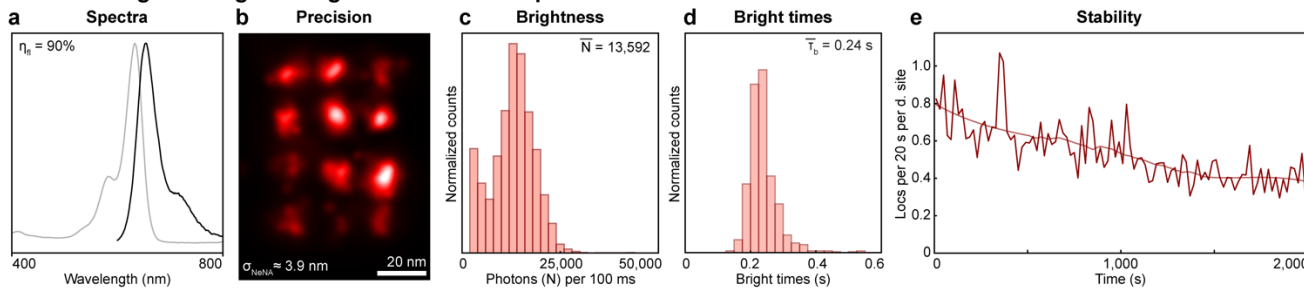

### f DNA origami average results for all buffer conditions

| Dye                | Ex. max. (nm) | Em. max. (nm) | QY  | Ext. ( $\times 10^3 \text{ M}^{-1} \text{ cm}^{-1}$ ) | Buffer additive | Precision (nm) | Photons per 100 ms | Bright time (s) | Signal to background ratio | Localization drop (%) | Destroyed binding sites (%) |
|--------------------|---------------|---------------|-----|-------------------------------------------------------|-----------------|----------------|--------------------|-----------------|----------------------------|-----------------------|-----------------------------|
| Abberior Star 635p | 638           | 651           | 0.9 | 120                                                   | -               | $4.9 \pm 0.5$  | $11526 \pm 825$    | $0.24 \pm 0.02$ | $2.1 \pm 0.1$              | $45.6 \pm 20.3$       | $14.0 \pm 6.9$              |
|                    |               |               |     |                                                       | Trolox          | $4.5 \pm 0.7$  | $12731 \pm 1037$   | $0.23 \pm 0.01$ | $2.3 \pm 0.3$              | $53.3 \pm 24.8$       | $17.9 \pm 11.6$             |
|                    |               |               |     |                                                       | PCA PCD Trolox  | $7.0 \pm 0.3$  | $3813 \pm 227$     | $0.40 \pm 0.00$ | $0.9 \pm 0.0$              | $81.6 \pm 2.3$        | $68.6 \pm 4.3$              |

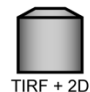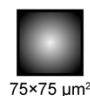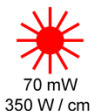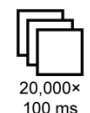

### U2OS Nup96 imaged using Abberior Star 635p with Trolox

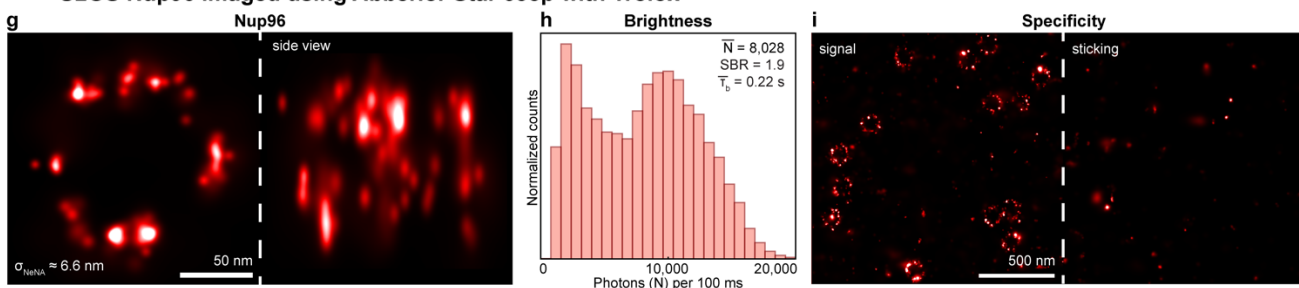

### j U2OS Nup96 average results with Trolox

| Dye                | Buffer additive | Precision (nm) | Photons per 100 ms | Bright time (s) | Signal to background ratio | Localization drop (%) | Relative specificity |
|--------------------|-----------------|----------------|--------------------|-----------------|----------------------------|-----------------------|----------------------|
| Abberior Star 635p | Trolox          | $8.0 \pm 1.3$  | $9609 \pm 2651$    | $0.22 \pm 0.01$ | $1.7 \pm 0.3$              | $6.7 \pm 6.1$         | $0.37 \pm 0.29$      |

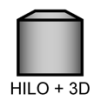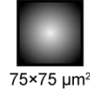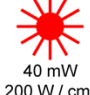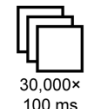

Supplementary Figure 10 | Dye analysis, Abberior Star 635p

### DNA origami imaged using Atto643 with Trolox

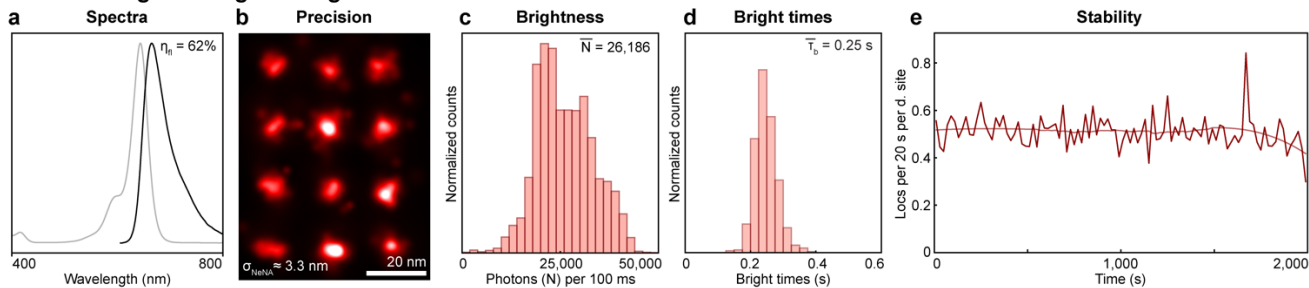

### f DNA origami average results for all buffer conditions

| Dye     | Ex. max. (nm) | Em. max. (nm) | QY   | Ext. ( $\times 10^3$ M <sup>-1</sup> cm <sup>-1</sup> ) | Buffer additive | Precision (nm) | Photons per 100 ms | Bright time (s) | Signal to background ratio | Localization drop (%) | Destroyed binding sites (%) |
|---------|---------------|---------------|------|---------------------------------------------------------|-----------------|----------------|--------------------|-----------------|----------------------------|-----------------------|-----------------------------|
| Atto643 | 643           | 665           | 0.62 | 150                                                     | -               | 3.9 ± 0.7      | 18148 ± 2632       | 0.25 ± 0.03     | 3.3 ± 0.8                  | 11.4 ± 10.3           | 1.0 ± 0.9                   |
|         |               |               |      |                                                         | Trolox          | 3.4 ± 0.3      | 23327 ± 6241       | 0.25 ± 0.01     | 4.3 ± 0.7                  | 12.1 ± 4.5            | 1.9 ± 0.5                   |
|         |               |               |      |                                                         | PCA PCD Trolox  | 4.7 ± 1.1      | 15525 ± 8480       | 0.24 ± 0.02     | 3.1 ± 1.3                  | 5.0 CI (0.0, 10.3)    | 0.9 CI (0.0, 1.8)           |

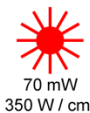

### U2OS Nup96 imaged using Atto643 with Trolox

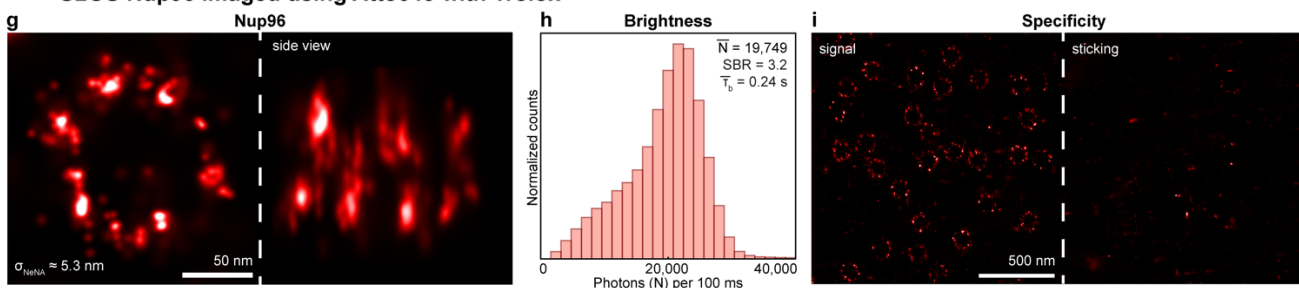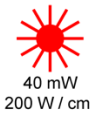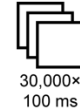

### j U2OS Nup96 average results with Trolox

| Dye     | Buffer additive | Precision (nm) | Photons per 100 ms | Bright time (s) | Signal to background ratio | Localization drop (%) | Relative specificity |
|---------|-----------------|----------------|--------------------|-----------------|----------------------------|-----------------------|----------------------|
| Atto643 | Trolox          | 5.3 ± 1.3      | 14803 ± 4342       | 0.26 ± 0.02     | 2.8 ± 0.5                  | 5.8 CI (0.0, 13.9)    | 0.66 ± 0.13          |

Supplementary Figure 11 | Dye analysis, Atto643

### DNA origami imaged using Atto647N with Trolox

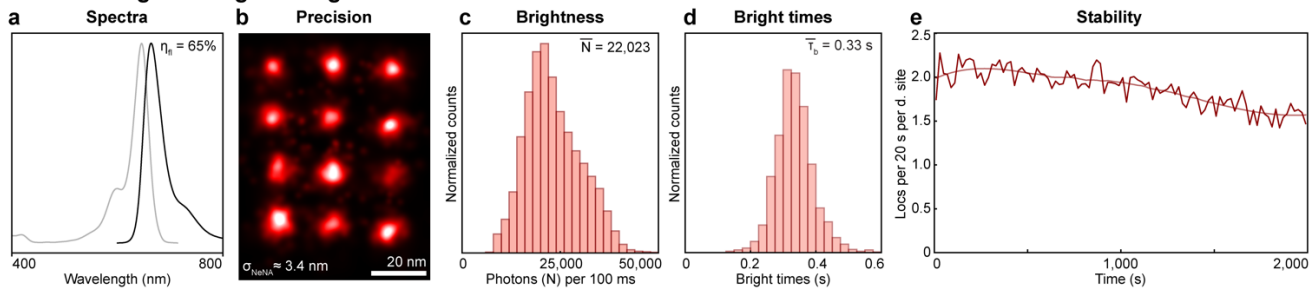

### f DNA origami average results for all buffer conditions

| Dye      | Ex. max. (nm) | Em. max. (nm) | QY   | Ext. ( $\times 10^3 \text{ M}^{-1} \text{ cm}^{-1}$ ) | Buffer additive | Precision (nm) | Photons per 100 ms | Bright time (s) | Signal to background ratio | Localization drop (%) | Destroyed binding sites (%) |
|----------|---------------|---------------|------|-------------------------------------------------------|-----------------|----------------|--------------------|-----------------|----------------------------|-----------------------|-----------------------------|
| Atto647N | 646           | 664           | 0.65 | 150                                                   | -               | $4.6 \pm 0.4$  | $13071 \pm 2270$   | $0.21 \pm 0.01$ | $2.9 \pm 0.1$              | 2.0 CI (0.0, 5.5)     | $7.0 \pm 4.0$               |
|          |               |               |      |                                                       | Trolox          | $3.4 \pm 0.1$  | $18448 \pm 3523$   | $0.32 \pm 0.01$ | $4.0 \pm 0.1$              | $18.7 \pm 9.2$        | $4.0 \pm 1.9$               |
|          |               |               |      |                                                       | PCA PCD Trolox  | $4.5 \pm 0.5$  | $14699 \pm 5124$   | $0.29 \pm 0.04$ | $2.9 \pm 0.6$              | 1.6 CI (0.0, 4.4)     | $3.2 \pm 1.1$               |

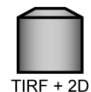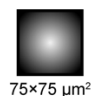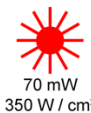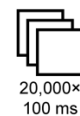

### U2OS Nup96 imaged using Atto647N with Trolox

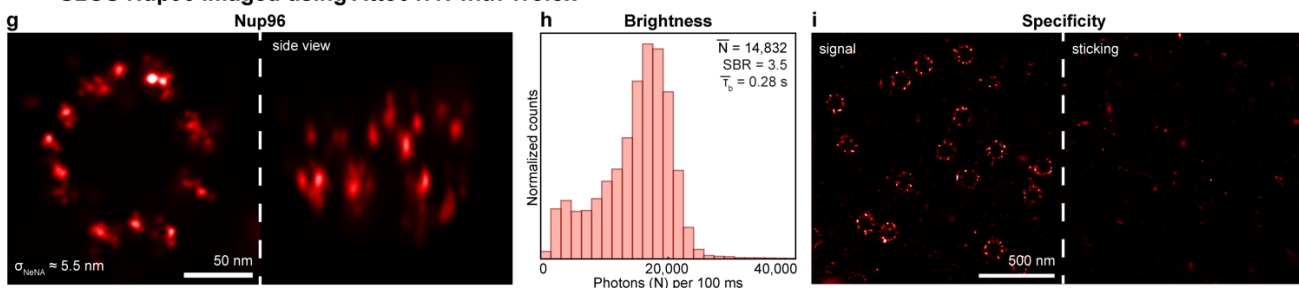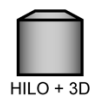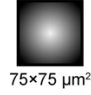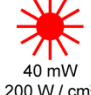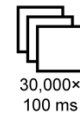

### j U2OS Nup96 average results with Trolox

| Dye      | Buffer additive | Precision (nm) | Photons per 100 ms | Bright time (s) | Signal to background ratio | Localization drop (%) | Relative specificity |
|----------|-----------------|----------------|--------------------|-----------------|----------------------------|-----------------------|----------------------|
| Atto647N | Trolox          | $6.1 \pm 0.8$  | $15396 \pm 1254$   | $0.27 \pm 0.01$ | $3.2 \pm 0.3$              | $4.8 \pm 2.7$         | $0.38 \pm 0.03$      |

Supplementary Figure 12 | Dye analysis, Atto647N

### DNA origami imaged using Atto655

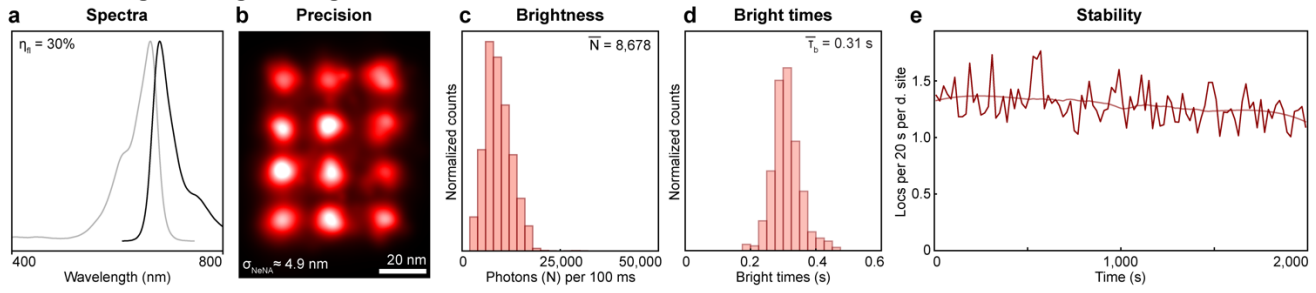

### f DNA origami average results for all buffer conditions

| Dye     | Ex. max. (nm) | Em. max. (nm) | QY  | Ext. ( $\times 10^3 \text{ M}^{-1} \text{ cm}^{-1}$ ) | Buffer additive | Precision (nm) | Photons per 100 ms | Bright time (s) | Signal to background ratio | Localization drop (%) | Destroyed binding sites (%) |
|---------|---------------|---------------|-----|-------------------------------------------------------|-----------------|----------------|--------------------|-----------------|----------------------------|-----------------------|-----------------------------|
| Atto655 | 663           | 680           | 0.3 | 125                                                   | -               | $5.8 \pm 1.7$  | $8273 \pm 2732$    | $0.27 \pm 0.04$ | $1.7 \pm 0.1$              | $8.9 \pm 4.0$         | $4.0 \pm 2.7$               |
|         |               |               |     |                                                       | PCA PCD         | $13.2 \pm 7.0$ | $3047 \pm 2388$    | $0.24 \pm 0.02$ | $0.8 \pm 0.4$              | 7.2 CI (0.0, 14.6)    | $4.8 \pm 3.8$               |
|         |               |               |     |                                                       | Trolox          | $16.6 \pm 6.7$ | $1147 \pm 107$     | $0.19 \pm 0.04$ | $0.4 \pm 0.0$              | 12.3 CI (0.0, 29.7)   | $4.8 \pm 3.4$               |

TIRF + 2D  
75×75  $\mu\text{m}^2$   
70 mW  
350 W /  $\text{cm}^2$   
20,000×  
100 ms

### U2OS Nup96 imaged using Atto655

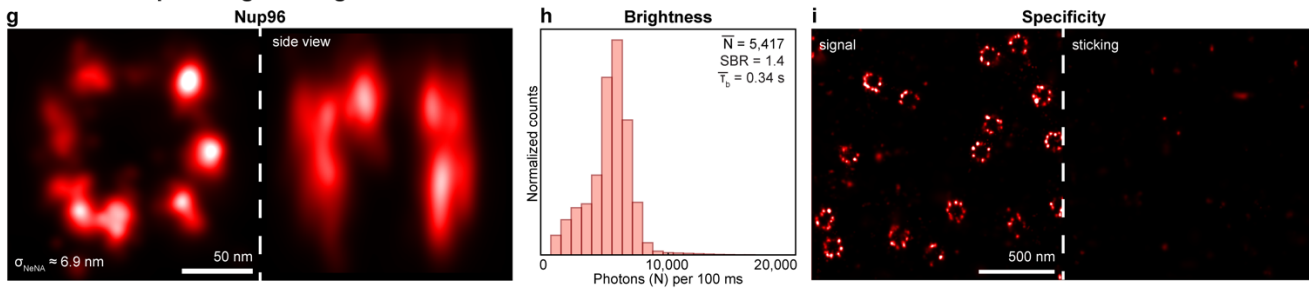

### j U2OS Nup96 average results

| Dye     | Buffer additive | Precision (nm) | Photons per 100 ms | Bright time (s) | Signal to background ratio | Localization drop (%) | Relative specificity |
|---------|-----------------|----------------|--------------------|-----------------|----------------------------|-----------------------|----------------------|
| Atto655 | -               | $7.3 \pm 0.5$  | $5763 \pm 1736$    | $0.31 \pm 0.04$ | $1.2 \pm 0.1$              | 2.3 CI (0.0, 6.3)     | $1.44 \pm 0.42$      |

HILO + 3D  
75×75  $\mu\text{m}^2$   
40 mW  
200 W /  $\text{cm}^2$   
30,000×  
100 ms

Supplementary Figure 13 | Dye analysis, Atto655

### DNA origami imaged using CF640R

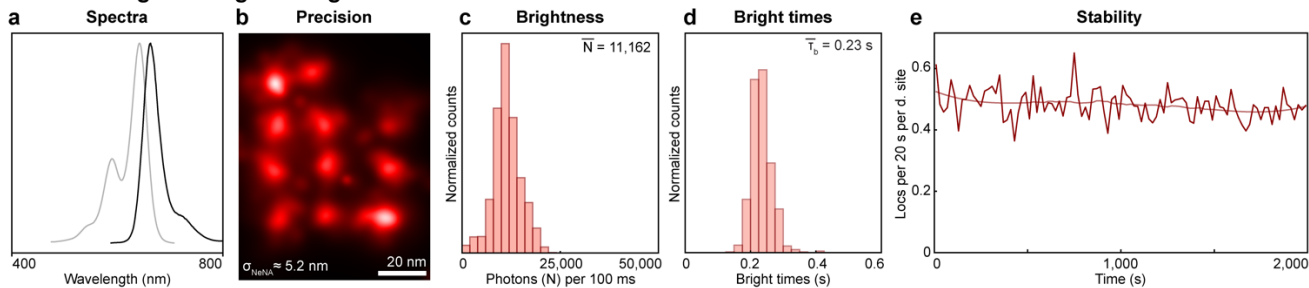

### f DNA origami average results for all buffer conditions

| Dye    | Ex. max. (nm) | Em. max. (nm) | QY | Ext. ( $\times 10^3 \text{ M}^{-1} \text{ cm}^{-1}$ ) | Buffer additive | Precision (nm) | Photons per 100 ms | Bright time (s) | Signal to background ratio | Localization drop (%) | Destroyed binding sites (%) |
|--------|---------------|---------------|----|-------------------------------------------------------|-----------------|----------------|--------------------|-----------------|----------------------------|-----------------------|-----------------------------|
| CF640R | 642           | 662           | -  | 105                                                   | -               | $5.5 \pm 1.0$  | $12024 \pm 3240$   | $0.22 \pm 0.01$ | $2.2 \pm 0.2$              | $7.5 \pm 2.5$         | $2.7 \pm 1.2$               |
|        |               |               |    |                                                       | Trolox          | $6.8 \pm 0.9$  | $7951 \pm 1883$    | $0.22 \pm 0.01$ | $1.8 \pm 0.1$              | $21.8 \pm 0.8$        | $3.3 \pm 1.3$               |
|        |               |               |    |                                                       | PCA PCD Trolox  | $10.4 \pm 0.1$ | $4176 \pm 858$     | $0.18 \pm 0.01$ | $1.1 \pm 0.4$              | $9.9 \pm 0.5$         | $3.7 \pm 1.1$               |

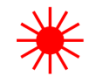

70 mW  
350 W / cm<sup>2</sup>



20,000x  
100 ms

### U2OS Nup96 imaged using CF640R

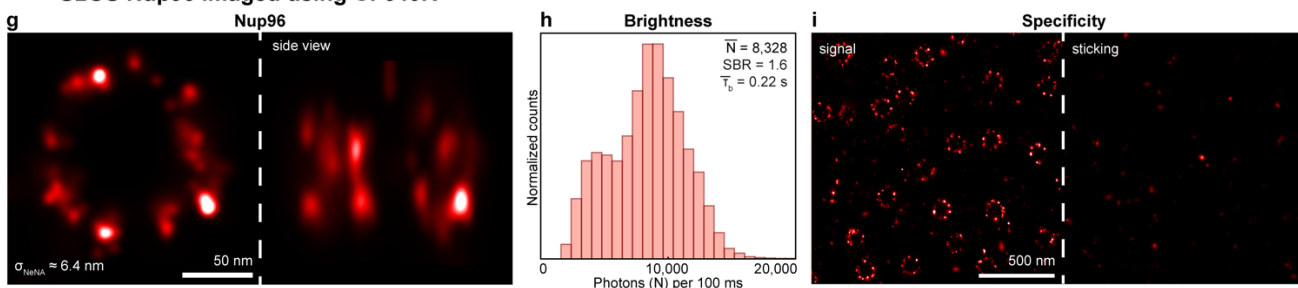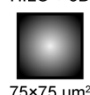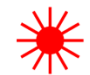

40 mW  
200 W / cm<sup>2</sup>



30,000x  
100 ms

### j U2OS Nup96 average results

| Dye    | Buffer additive | Precision (nm) | Photons per 100 ms | Bright time (s) | Signal to background ratio | Localization drop (%) | Relative specificity |
|--------|-----------------|----------------|--------------------|-----------------|----------------------------|-----------------------|----------------------|
| CF640R | -               | $7.3 \pm 0.8$  | $7539 \pm 2114$    | $0.21 \pm 0.01$ | $1.3 \pm 0.3$              | $5.7 \pm 5.0$         | $1.15 \pm 0.39$      |

Supplementary Figure 14 | Dye analysis, CF640R



### DNA origami imaged using CF660R

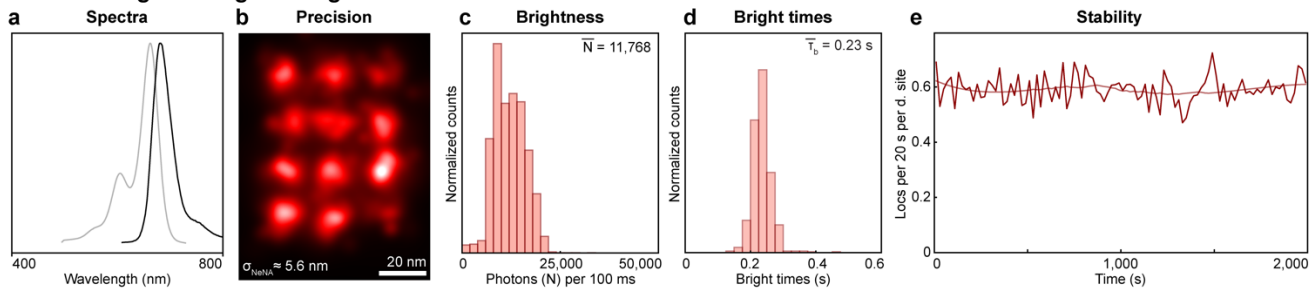

### f DNA origami average results for all buffer conditions

| Dye    | Ex. max. (nm) | Em. max. (nm) | QY | Ext. ( $\times 10^3 \text{ M}^{-1} \text{ cm}^{-1}$ ) | Buffer additive | Precision (nm) | Photons per 100 ms | Bright time (s) | Signal to background ratio | Localization drop (%) | Destroyed binding sites (%) |
|--------|---------------|---------------|----|-------------------------------------------------------|-----------------|----------------|--------------------|-----------------|----------------------------|-----------------------|-----------------------------|
| CF660R | 663           | 682           | -  | 100                                                   | -               | $6.6 \pm 0.9$  | $10399 \pm 1309$   | $0.21 \pm 0.02$ | $2.3 \pm 0.3$              | $4.2 \pm 3.8$         | $2.8 \pm 0.8$               |
|        |               |               |    |                                                       | Trolox          | $6.7 \pm 0.8$  | $8894 \pm 1493$    | $0.21 \pm 0.02$ | $2.2 \pm 0.0$              | $11.3 \pm 2.5$        | $1.8 \pm 0.5$               |
|        |               |               |    |                                                       | PCA PCD Trolox  | $9.4 \pm 1.3$  | $6200 \pm 468$     | $0.18 \pm 0.01$ | $1.6 \pm 0.5$              | $7.8 \pm 6.2$         | $2.8 \pm 1.3$               |

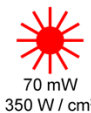

### U2OS Nup96 imaged using CF660R

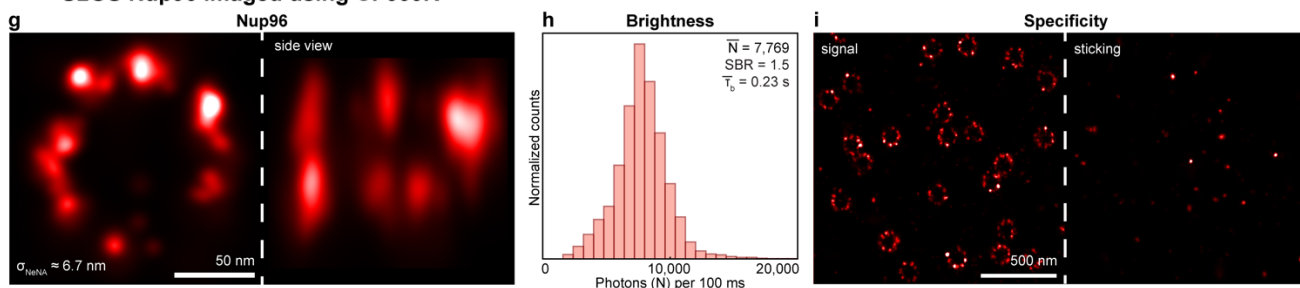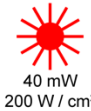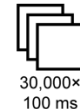

### j U2OS Nup96 average results

| Dye    | Buffer additive | Precision (nm) | Photons per 100 ms | Bright time (s) | Signal to background ratio | Localization drop (%) | Relative specificity |
|--------|-----------------|----------------|--------------------|-----------------|----------------------------|-----------------------|----------------------|
| CF660R | -               | $6.8 \pm 0.1$  | $7219 \pm 583$     | $0.24 \pm 0.01$ | $1.6 \pm 0.1$              | $1.8 \pm 1.7$         | $0.83 \pm 0.20$      |

Supplementary Figure 15 | Dye analysis, CF660R

### DNA origami imaged using Cy5 with PCA / PCD / Trolox

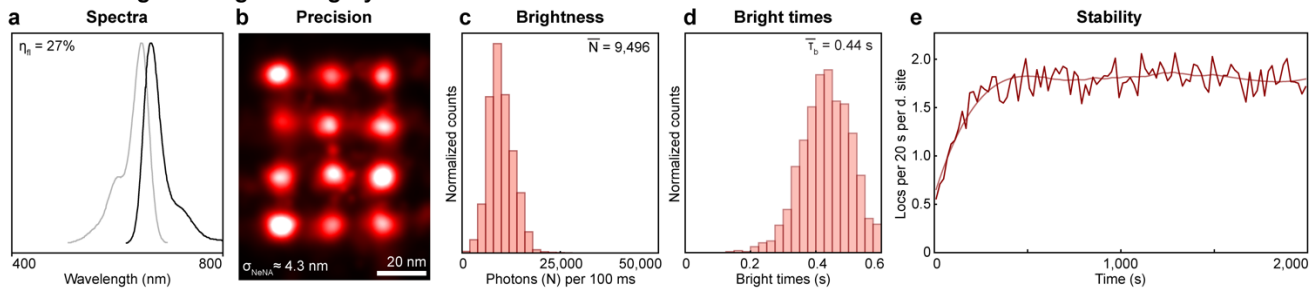

### f DNA origami average results for all buffer conditions

| Dye | Ex. max. (nm) | Em. max. (nm) | QY   | Ext. ( $\times 10^3$ M $^{-1}$ cm $^{-1}$ ) | Buffer additive | Precision (nm) | Photons per 100 ms | Bright time (s) | Signal to background ratio | Localization drop (%) | Destroyed binding sites (%) |
|-----|---------------|---------------|------|---------------------------------------------|-----------------|----------------|--------------------|-----------------|----------------------------|-----------------------|-----------------------------|
| Cy5 | 651           | 670           | 0.27 | 250                                         | -               | 12.5 $\pm$ 4.1 | 3268 $\pm$ 524     | 0.19 $\pm$ 0.02 | 1.2 $\pm$ 0.1              | 41.9 $\pm$ 14.1       | 8.7 $\pm$ 4.4               |
|     |               |               |      |                                             | Trolox          | 9.2 $\pm$ 0.4  | 5118 $\pm$ 2106    | 0.19 $\pm$ 0.01 | 1.5 $\pm$ 0.2              | 35.7 $\pm$ 4.2        | 8.8 $\pm$ 3.0               |
|     |               |               |      |                                             | PCA PCD Trolox  | 4.7 $\pm$ 0.6  | 7801 $\pm$ 1722    | 0.42 $\pm$ 0.02 | 2.0 $\pm$ 0.1              | 0.0 $\pm$ 0.0         | 2.1 $\pm$ 1.8               |

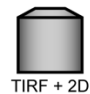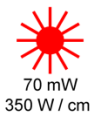

### U2OS Nup96 imaged using Cy5 with PCA / PCD / Trolox

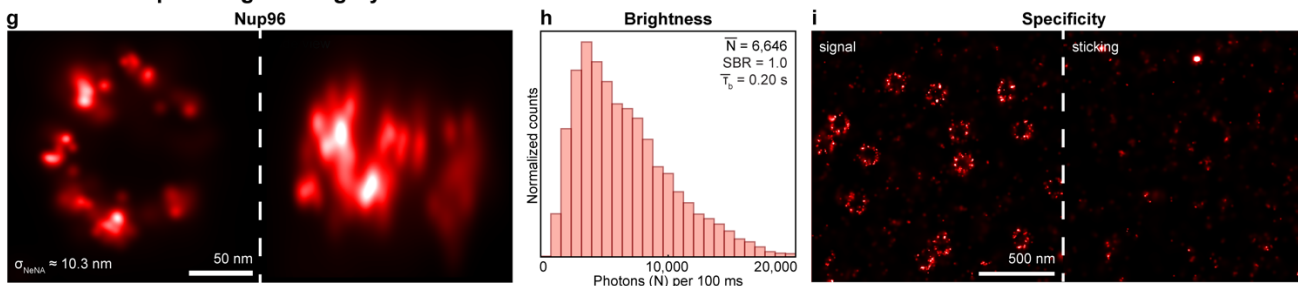

### j U2OS Nup96 average results with PCA / PCD / Trolox

| Dye | Buffer additive | Precision (nm) | Photons per 100 ms | Bright time (s) | Signal to background ratio | Localization drop (%) | Relative specificity |
|-----|-----------------|----------------|--------------------|-----------------|----------------------------|-----------------------|----------------------|
| Cy5 | PCA PCD Trolox  | 10.0 $\pm$ 2.0 | 6031 $\pm$ 540     | 0.21 $\pm$ 0.03 | 1.1 $\pm$ 0.2              | 54.4 $\pm$ 18.0       | 0.72 $\pm$ 0.14      |

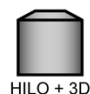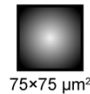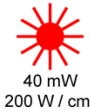

Supplementary Figure 16 | Dye analysis, Cy5

### DNA origami imaged using Cy5B with PCA / PCD / Trolox

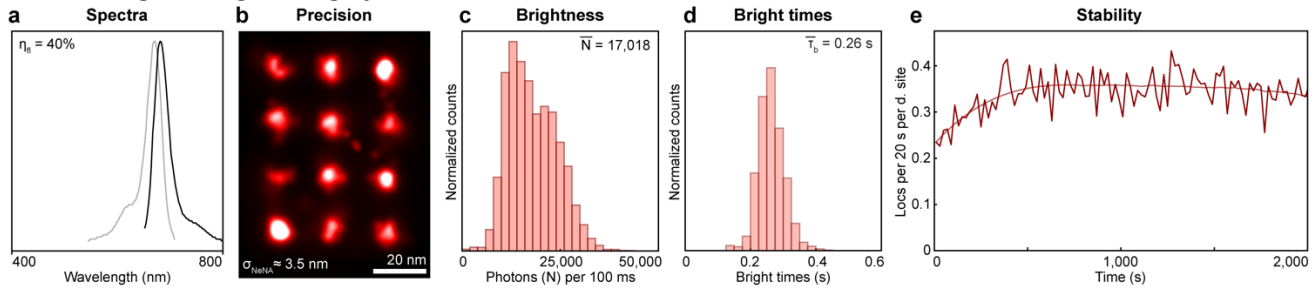

### f DNA origami average results for all buffer conditions

| Dye  | Ex. max. (nm) | Em. max. (nm) | QY  | Ext. ( $\times 10^3 \text{ M}^{-1} \text{ cm}^{-1}$ ) | Buffer additive | Precision (nm) | Photons per 100 ms | Bright time (s) | Signal to background ratio | Localization drop (%) | Destroyed binding sites (%) |
|------|---------------|---------------|-----|-------------------------------------------------------|-----------------|----------------|--------------------|-----------------|----------------------------|-----------------------|-----------------------------|
| Cy5B | 671           | 682           | 0.4 | 241                                                   | -               | $4.9 \pm 0.1$  | $16123 \pm 2066$   | $0.19 \pm 0.01$ | $3.1 \pm 0.7$              | $17.1 \pm 0.6$        | $3.3 \pm 0.6$               |
|      |               |               |     |                                                       | Trolox          | $4.1 \pm 0.4$  | $20804 \pm 4255$   | $0.21 \pm 0.02$ | $3.7 \pm 0.9$              | $11.5 \pm 6.9$        | $2.8 \pm 0.5$               |
|      |               |               |     |                                                       | PCA PCD Trolox  | $4.0 \pm 0.4$  | $17090 \pm 2765$   | $0.25 \pm 0.02$ | $2.9 \pm 0.5$              | 0.3 Cl (0.0,0.8)      | $2.1 \pm 0.5$               |

TIRF + 2D  
75×75  $\mu\text{m}^2$   
70 mW  
350 W /  $\text{cm}^2$   
20,000×  
100 ms

### U2OS Nup96 imaged using Cy5B with PCA / PCD / Trolox

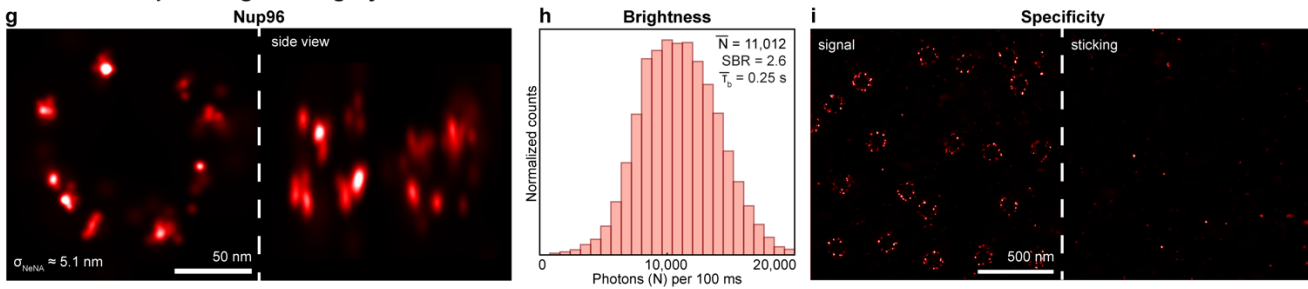

### j U2OS Nup96 average results with PCA / PCD / Trolox

| Dye  | Buffer additive | Precision (nm) | Photons per 100 ms | Bright time (s) | Signal to background ratio | Localization drop (%) | Relative specificity |
|------|-----------------|----------------|--------------------|-----------------|----------------------------|-----------------------|----------------------|
| Cy5B | PCA PCD Trolox  | $5.6 \pm 0.5$  | $9483 \pm 2068$    | $0.25 \pm 0.01$ | $2.2 \pm 0.6$              | $20.9 \pm 18.4$       | $0.77 \pm 0.16$      |

HILO + 3D  
75×75  $\mu\text{m}^2$   
40 mW  
200 W /  $\text{cm}^2$   
30,000×  
100 ms

Supplementary Figure 17 | Dye analysis, Cy5B

### DNA origami imaged using Janelia Fluor 646

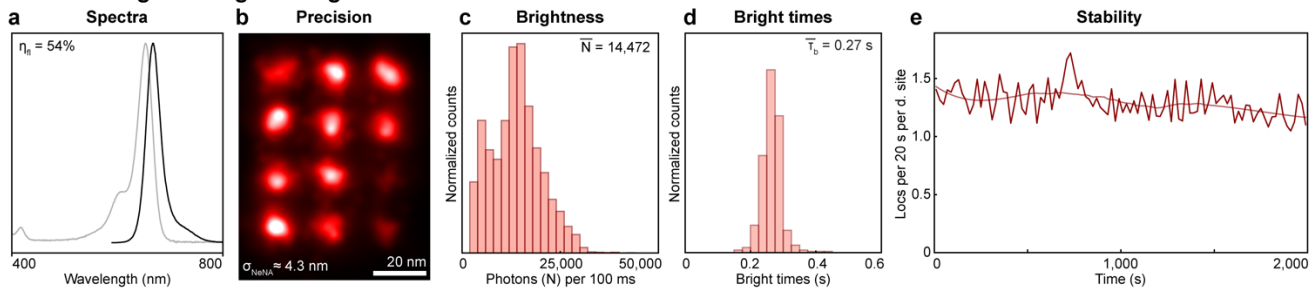

### f DNA origami average results for all buffer conditions

| Dye               | Ex. max. (nm) | Em. max. (nm) | QY   | Ext. ( $\times 10^3 \text{ M}^{-1} \text{ cm}^{-1}$ ) | Buffer additive | Precision (nm) | Photons per 100 ms | Bright time (s) | Signal to background ratio | Localization drop (%) | Destroyed binding sites (%) |
|-------------------|---------------|---------------|------|-------------------------------------------------------|-----------------|----------------|--------------------|-----------------|----------------------------|-----------------------|-----------------------------|
| Janelia Fluor 646 | 646           | 664           | 0.54 | 152                                                   | -               | $4.3 \pm 0.1$  | $14440 \pm 3596$   | $0.25 \pm 0.03$ | $2.6 \pm 0.4$              | $23.3 \pm 9.1$        | $5.6 \pm 2.6$               |
|                   |               |               |      |                                                       | Trolox          | $5.8 \pm 2.0$  | $12660 \pm 4664$   | $0.25 \pm 0.04$ | $2.6 \pm 0.4$              | 14.4 Cl (0.0, 29.0)   | 2.5 Cl (0.0, 6.0)           |
|                   |               |               |      |                                                       | PCA PCD Trolox  | $5.6 \pm 0.2$  | $10743 \pm 1597$   | $0.25 \pm 0.01$ | $2.4 \pm 0.7$              | 1.6 Cl (0.0, 3.9)     | $4.0 \pm 0.1$               |



### U2OS Nup96 imaged using Janelia Fluor 646

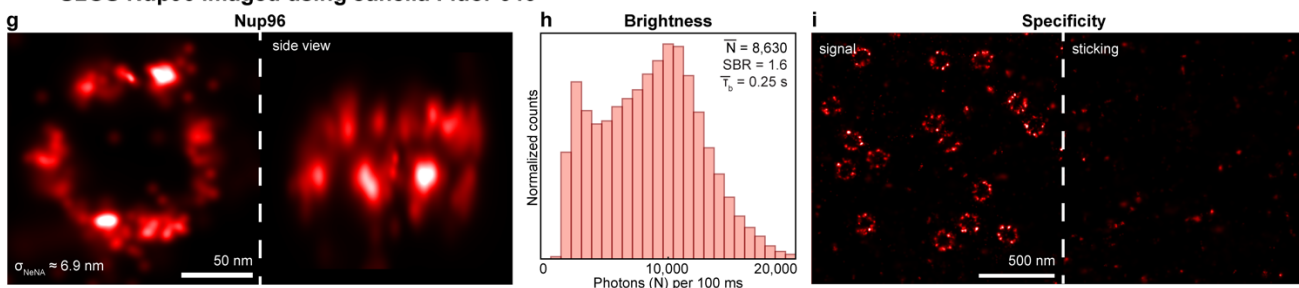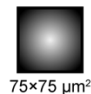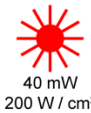

### j U2OS Nup96 average results

| Dye               | Buffer additive | Precision (nm) | Photons per 100 ms | Bright time (s) | Signal to background ratio | Localization drop (%) | Relative specificity |
|-------------------|-----------------|----------------|--------------------|-----------------|----------------------------|-----------------------|----------------------|
| Janelia Fluor 646 | -               | $9.3 \pm 3.0$  | $8221 \pm 1152$    | $0.26 \pm 0.01$ | $1.7 \pm 0.1$              | $7.0 \pm 6.8$         | $0.43 \pm 0.06$      |

Supplementary Figure 18 | Dye analysis, Janelia Fluor 646

Supplementary Table 1 | Imaging parameters

| Target & imaging round            | Laser [nm]        | Laser power at objective [mW] | Laser power density [W/cm <sup>2</sup> ] | Imager                             | Imager conc. [pM]                                            | Buffer and additive     | Number of frames | Imaging time [min] |
|-----------------------------------|-------------------|-------------------------------|------------------------------------------|------------------------------------|--------------------------------------------------------------|-------------------------|------------------|--------------------|
| DNA origami, barcode & reference  | 560               | 35                            | 175                                      | R1-Cy3B<br>R3-Cy3B                 | 500<br>500                                                   | B with PCA, PCD, Trolox | 10,000           | 16.7               |
| DNA origami, blue dyes            | 488               | 20                            | 100                                      | R1-Dye of interest                 | 500                                                          | B, all conditions       | 20,000           | 33.3               |
| DNA origami, green dyes           | 560               | 35                            | 175                                      | R1-Dye of interest                 | 500                                                          | B, all conditions       | 20,000           | 33.3               |
| DNA origami, red dyes             | 640               | 70                            | 350                                      | R1-Dye of interest                 | 300 (Cy5, Atto643, Atto647N),<br>500 (rest)                  | B, all conditions       | 20,000           | 33.3               |
| DNA origami, var. powers, CF488   | 488               | 10, 20, 40, 60, 80, 100       | 50, 100, 200, 300, 400, 500              | R1-CF488A                          | 500                                                          | B with Trolox           | 20,000           | 33.3               |
| DNA origami, var. powers, Cy3B    | 560               | 35, 50, 100, 150              | 175, 250, 500, 750                       | R1-Cy3B                            | 500                                                          | B with PCA, PCD, Trolox | 20,000           | 33.3               |
| DNA origami, var. powers, Atto643 | 640               | 35, 70, 100, 150, 200         | 175, 350, 500, 750, 1000                 | R1-Atto643                         | 500                                                          | B with Trolox           | 20,000           | 33.3               |
|                                   |                   |                               |                                          |                                    |                                                              |                         |                  |                    |
| U2OS NPC, reference               | 560               | 20                            | 100                                      | R1-Cy3B                            | 80                                                           | C with PCA, PCD, Trolox | 30,000           | 50                 |
| U2OS NPC, blue dyes               | 488               | 15                            | 75                                       | R1-Dye of interest                 | 80 - 120                                                     | C with optimal additive | 30,000           | 50                 |
| U2OS NPC, green dyes              | 560               | 20                            | 100                                      | R1-Dye of interest                 | 80 - 100                                                     | C with optimal additive | 30,000           | 50                 |
| U2OS NPC, red dyes                | 640               | 40                            | 200                                      | R1-Dye of interest                 | 40 - 80 (Atto643),<br>20 - 50 (Atto647N),<br>80 - 100 (rest) | C with optimal additive | 30,000           | 50                 |
|                                   |                   |                               |                                          |                                    |                                                              |                         |                  |                    |
| U2OS Tom20, reference             | 560               | 20                            | 100                                      | R1-Cy3B                            | 100                                                          | C with PCA, PCD, Trolox | 30,000           | 50                 |
| U2OS Tom20, blue dyes             | 488               | 15                            | 75                                       | R1-Dye of interest                 | 100                                                          | C with optimal additive | 30,000           | 50                 |
| U2OS Tom20, green dyes            | 560               | 20                            | 100                                      | R1-Dye of interest                 | 100                                                          | C with optimal additive | 30,000           | 50                 |
| U2OS Tom20, red dyes              | 640               | 40                            | 200                                      | R1-Dye of interest                 | 100                                                          | C with optimal additive | 30,000           | 50                 |
|                                   |                   |                               |                                          |                                    |                                                              |                         |                  |                    |
| Neurons, round 1                  | 488<br>560<br>640 | 15<br>20<br>40                | 75<br>100<br>200                         | R1-CF488A<br>R4-Cy3B<br>R6-Atto643 | 200<br>150<br>350                                            | C with Trolox           | 30,000           | 50                 |
| Neurons, round 2                  | 488<br>560<br>640 | 15<br>20<br>40                | 75<br>100<br>200                         | R5-CF488A<br>R3-Cy3B<br>R2-Atto643 | 150<br>300<br>100                                            | C with Trolox           | 30,000           | 50                 |

Imaging conditions for all measurements. The exposure time was set to 100 ms for all measurements. DNA origami “dye of interest” experiments were carried out with only buffer B, buffer B with Trolox, and buffer B with PCA, PCD, and Trolox for all dyes. U2OS NPC and Tom20 “dye of interest” experiments were carried out with the optimal buffer additive for each dye, specified in **Supplementary Figures 1-18**.

Supplementary Table 2 | Sequences

| Imager name | Imager Sequence | Docking strand sequence |
|-------------|-----------------|-------------------------|
| R1          | AGGAGGA         | TCCTCCTCCTCCTCCTCCT     |
| R2          | TGGTGGT         | ACCACCACCACCACCACCA     |
| R3          | GAGAGAG         | CTCTCTCTCTCTCTCTC       |
| R4          | TGTGTGT         | ACACACACACACACACA       |
| R5          | GAAGAAG         | CTTCTTCTTCTTCTTCTC      |
| R6          | TTGTTGTT        | AACAACAACAACAACAACA     |

Supplementary Table 3 | Antibodies

| Antibody                                      | Vendor                     | Information                               | Dilution |
|-----------------------------------------------|----------------------------|-------------------------------------------|----------|
| Mouse monoclonal (SAP7F407) anti-Bassoon      | Enzo                       | Cat# ADI-VAM-PS003-F;<br>RRID:AB_11181058 | 1 in 200 |
| Rabbit polyclonal anti-VGAT                   | invitrogen                 | Cat# PA5-27569;<br>RRID:AB_2545045        | 1 in 300 |
| Rabbit monoclonal (EPR15581-54) anti-Tom20    | Abcam                      | Cat# ab186735;<br>RRID:AB_2889972         | 1 in 200 |
| Mouse monoclonal (69H10) anti-Neurofilament L | Synaptic Systems           | Cat# 171011;<br>RRID:AB_2891275           | 1 in 200 |
| Mouse monoclonal (42/B) anti-βII Spectrin     | BD Biosciences             | Cat# 612562;<br>RRID:AB_399853            | 1 in 100 |
| sdAb anti-PSD95 (1B2)                         | NanoTag<br>Biotechnologies | Cat# N3705                                | 1 in 200 |
| sdAb anti-GFP (1H1)                           | NanoTag<br>Biotechnologies | Cat# N0305                                | 1 in 200 |
| sdAb anti-Mouse IgG (10A4)                    | NanoTag<br>Biotechnologies | Cat# N2005                                | 1 in 300 |
| sdAb anti-Rabbit IgG (10E10)                  | NanoTag<br>Biotechnologies | Cat# N2405                                | 1 in 300 |
| Multiplexing Blocker Mouse                    | NanoTag<br>Biotechnologies | Cat# K0102-50                             | 1 in 200 |
| Multiplexing Blocker Mouse                    | NanoTag<br>Biotechnologies | Cat# K0202-50                             | 1 in 200 |

Supplementary Table 4 | Cross-talk in 3-channel imaging

| Dye added                                 | Atto643  | Cy3b     | CF488    |
|-------------------------------------------|----------|----------|----------|
| Number of locs detected in red channel    | 1145912  | 894      | 1720     |
| Number of locs detected in green channel  | 1497     | 1798626  | 6253     |
| Number of locs detected in blue channel   | 4818     | 14587    | 993884   |
|                                           |          |          |          |
| Total number of locs                      | 1152227  | 1814107  | 1001857  |
|                                           |          |          |          |
| Percent of locs detected in red channel   | 99.45    | 0.05     | 0.17     |
| Percent of locs detected in green channel | 0.13     | 99.15    | 0.62     |
| Percent of locs detected in blue channel  | 0.42     | 0.80     | 99.20    |
|                                           |          |          |          |
| Ratio red / correct                       | 1.000000 | 0.000497 | 0.001731 |
| Ratio green / correct                     | 0.001306 | 1.000000 | 0.006291 |
| Ratio blue / correct                      | 0.004205 | 0.008110 | 1.000000 |

Supplementary Table 5 | DNA origami scaffold sequence

```

TCCCTTCCTTTCTCGCCACGTTGCGCCGGCTTTCCCGTCAAGCTCTAAATCGGGGGCTCCCTTTAGGGTTCCGA
TTTAGTGCTTTACGGCACCTCGACCCAAAAAACTTGATTTGGGTGATGGTTCACGTAGTGGGCCATCGCCCTG
ATAGACGGTTTTTCGCCCTTTGACGTTGGAGTCCACGTTCTTTAATAGTGGACTCTTTGCCAAACTGGAACAA
CACTCAACCCTATCTCGGGCTATTCTTTTGATTTATAAGGGATTTTGCCGATTTCGGAACCACCATCAAACAGGAT
TTTTGCCTGTCTGGGCAAACCGTGGACCGCTTGTGCAACTCTCAGGGCCAGGCGGTGAAGGGCAAT
CAGCTGTTGCCGTCTCACTGGTAAAAGAAAAACCCCTGGCGCCCAATACGCAAACCGCTCTCCCCGCG
CGTTGGCCGATTCATTAATGCAGCTGGCAGCACAGTTTTCCCGACTGGAAAAGCGGGCAGTGAGCGCAACGCA
ATTAATGTGAGTTAGCTCACTCATTAGGCACCCAGGCTTTACACTTTATGCTTCCGGCTCGTATGTTGTGTGGA
ATTGTGAGCGGATAACAATTTACACAGGAAACAGCTATGACCATGATTACGAATTCGAGCTCGGTACCCGGGG
ATCCTCTAGAGTCGACCTGCAGGCATGCAAGCTTGGCACTGGCCGTCTTTTACAACGTCGTGACTGGGAAAA
CCCTGGCGTTACCCAACCTAATCGCCTTGCAGCACATCCCCCTTTCGCCAGCTGGCGTAATAGCGAAGAGGCC
GCACCGATCGCCCTTCCCAACAGTTGCGCAGCCTGAATGGCGAATGGCGCTTTGCCTGGTTTTCCGGCACCAGA
AGCGGTGCCGAAAGCTGGAGTGGAGTGCATCTTCTGAGGCGGATACTGTGTCGTCCCGCTCAAAGTCAGAG
ATGCACGGTTACGATGCGCCATCTACACCAACGTGACCTATCCCATTACGGTCAATCCGCCGTTTTGTTCCACG
GAGAATCCGACGGGTTGTTACTCGCTCACATTTAATGTTGATGAAAGCTGGCTACAGGAAGGCCAGACGCGAA
TTATTTTTGATGGCGTTCCTATTGGTTAAAAAATGAGCTGATTTAACAAAAATTTAATGCGAATTTTAAACAAATA
TTAACGTTTACAATTTAAATATTTGCTTATACAATCTTCTGTTTTTGGGGCTTTTCTGATTATCAACCGGGGTACA
TATGATTGACATGCTAGTTTTACGATTACCGTTCATCGATTCTCTTGTGTTGCTCCAGACTCTCAGGCAATGACCTG
ATAGCCTTTGTAGATCTCTCAAAAATAGCTACCCCTCCCGCATTAAATTTATCAGCTAGAACGGTTGAATATCATAT
TGATGGTATTTGACTGTCTCCGGCCTTTCTACCCCTTTTGAATCTTTACCTACACATTACTCAGGCATTGCATTTA
AAATATATGAGGGTCTAAAAATTTTTATCCTTGCCTTGAATAAAGGCTTCTCCCGCAAAGTATTACAGGGTC
ATAATGTTTTTGGTACAACCGATTTAGCTTTATGCTCTGAGGCTTTATTGCTTAATTTTGTAAATTTTGCCTTGC
CTGTATGATTTATTGGATGTTAATGCTACTACTATTAGTAGAATTGATGCCACCTTTTACGCTCGCGCCCCAAATGA
AAATATAGCTAAACAGGTTATTGACCATTTGCGAAATGTATCTAATGGTCAAACCTAAATCTACTCGTTCGCAGAAT
TGGGAATCAACTGTTATATGGAATGAAACTTCCAGACACCGTACTTTAGTTGCATATTTAAACATGTTGAGCTA
CAGCATATATTAGCAATTAAGCTCTAAGCCATCCGCAAAAATGACCTTTATCAAAGGAGCAATTAAGGTA
CTCTCTAATCTGACCTGTTGGAGTTTGGCTTCCGGCTGGTTTCGCTTTGAAGCTCGAATTAACCGCATATTTG
AAGCTTTTCCGGCTTCTTAAATCTTTTTGATGCAATCCGCTTTGCTTCTGACTATAATAGTCAGGGTAAAGACC
TGATTTTTGATTTATGGTCAATCTCGTTTTCTGAACTGTTTAAAGCATTTGAGGGGATTCAATGAATATTTATGA
CGATTCCGCAGTATTGGACGCTATCCAGTCTAAACATTTTACTATTACCCCTCTGGCAAAACTCTTTTTGCAAAA
GCCTCTCGCTATTTTGGTTTTTATCGTCTGTTGTAACGAGGGTTATGATAGTGTGCTCTTACTATGCCTCGTA
ATTCCTTTTGGCGTTATGTATCTGCATTAGTTGAATGTGGTATTCCATAATCTCAAACGATGAATCTTTCTACCTGT
AATAATGTTGTTCCGTTAGTTCGTTTTAATACGTAGATTTTTCTTCCCAACGTCCTGACTGGTATAATGAGCCAG
TTCTTAAAATCGCATAAGGTAATTCACAATGATTAAGTTGAATTAACCATCTCAAGCCCAATTTACTACTCGT
TCTGGTGTCTCGTCAAGGCAAGCCTTATTCTGAAATGAGCAGCTTTGTTACGTTGATTTGGGTAATGAATAT
CCGGTTCCTGTCAAGATTACTTGTGATGAAGGTGAGCCAGCCTATGCGCCTGGTCTGTACACCGTTCATCTGTCC
    
```

TCTTTCAAAGTTGGTCAGTTCGGTTCCTTATGATTGACCGTCTGCGCCTCGTTCCGGCTAAGTAACATGGAGCA  
GGTCGCGGATTTTCGACACAATTTATCAGGCGATGATACAAATCTCCGTTGACTTTGTTTCGCGCTTGGTATAATC  
GCTGGGGGTCAAAGATGAGTGTTTTAGTGTATTCTTTGCCTCTTTTCGTTTATAGTTGGTGCCTTCGTAGTGGCA  
TTACGTATTTTACCCGTTTAAATGGAACTTCTCATGAAAAGTCTTTAGTCTCAAAGCCTCTGTAGCCGTTGCT  
ACCCCTCGTCCGATGTCTTTCGCTGCTGAGGGTGACGATCCCGCAAAGCGGCCTTTAACTCCCTGCAAGC  
CTCAGCGACCCGAATATATCGTTATGCGTGGCGATGTTTGTTCATTGTCGGCGCAACTATCGGTATCAAGCT  
GTTTAAAGAAATTCACCTCGAAAGCAAGCTGATAAACCAGATAACAATTAAGGCTCCTTTTGGAGCCTTTTTTTG  
GAGATTTTCAACGTGAAAAAATTATTATTCGCAATTCCTTTAGTTGTTTCTTTCTATTCTACTCCGCTGAAACTG  
TTGAAAGTTGTTTAGCAAAATCCCATACAGAAAATTCATTTACTAACGTCTGAAAGACGACAAAATTTAGATC  
GTTACGCTAACTATGAGGGCTGTCTGTGGAATGCTACAGGCGTTGTAGTTTGTACTGGTGACGAAACTCAGTGT  
TACGGTACATGGGTTCTATTGGGCTTGTATCCCTGAAAAATGAGGGTGGTGGCTCTGAGGGTGGCGGTTCTG  
AGGGTGGCGGTTCTGAGGGTGGCGGTACTAAACCTCCTGAGTACGGTGATACACCTATTCCGGGCTATACTTAT  
ATCAACCCTCTCGACGCACTTATCCGCTGATCTAGCAAAAACCCGCTAATCCTAATCCTTCTCTTCTGAGGAG  
TCTCAGCCTCTTAATACTTTTCATGTTTTCAGAATAATAGGTTCCGAAATAGGCAGGGGGCATTAACTGTTTATACG  
GGCACTGTTACTCAAGGCACTGACCCCGTTAAAACTTATTACCAGTACACTCCTGTATCATCAAAGCCATGTAT  
GACGCTTACTGGAACGGTAAATTCAGAGACTGCGCTTCCATTCTGGCTTAAATGAGGATTTATTTGTTTGTGAA  
TATCAAGGCCAATCGTCTGACCTGCCTCAACCTCCTGTCAATGCTGGCGGCGGCTCTGGTGGTGGTTCTGGTGG  
CGGCTCTGAGGGTGGTGGCTCTGAGGGTGGCGGTTCTGAGGGTGGCGGCTCTGAGGGAGGCGGTTCCGGTG  
GTGGCTCTGGTCCGGTATTGTTGATTGAAAAGATGGCAAACGTAATAAGGGGGCTATGACCGAAAAATGCC  
GATGAAAACGCGCTACAGTCTGACGCTAAAGGCAAACTTGATTCTGTCGCTACTGATTACGGTCTGCTATCGA  
TGGTTTCAATGGTGACGTTTCCGGCCTTGCTAATGGTAATGGTCTACTGGTGATTTTGTGGCTCTAATTTCCA  
AATGGCTCAAGTCGGTGACGGTGATAATTCACCTTAAATGAATAATTTCCGTCATATTTACCTTCCCTCCCTCAAT  
CGGTTGAATGTCGCCCTTTTGTCTTTGGCGCTGGTAAACCATATGAATTTTCTATTGATTGTGACAAAATAAACTT  
ATTCGGTGGTGTCTTTGCGTTTCTTTTATATGTTGCCACCTTATGTATGATTTTCTACGTTTGCTAACATACTGCG  
TAATAAGGAGTCTTAATCATGCCAGTCTTTTGGGTATTCCGTTATTATTGCGTTTCTCGGTTTCTTCTGGTAAC  
TTTGTTCGGCTACTGCTTACTTTTCTTAAAAAGGGCTTCGGTAAAGTAGCTATTGCTATTTTATTGTTTCTTGTCT  
TTATTATTGGGCTAACTCACTTGTGGGTTATCTCTCTGATATTAGCGCTCAATTACCCTGACTTTGTTGTCAG  
GGTGTTCAGTTAATTTCTCCCGTCTAATGCGCTTCCCTGTTTTTATGTTATTCTCTCTGTAAAGGCTGCTATTTTCT  
TTTTGACGTTAAACAAAAATCGTTTCTTATTGGATTGGGATAAATAATGGCTGTTTATTTTGTAACTGGCAA  
ATTAGGCTCTGAAAAGACGCTCGTTAGCGTTGGTAAGATTCAGGATAAAATTTAGCTGGGTGCAAAAATAGCA  
ACTAATCTTGATTTAAGGCTTCAAACCTCCCGCAAGTCGGGAGGTTGCTAAAACGCTCGCGTTCTTAGAAT  
ACCGGATAAGCCTTCTATATCTGATTTGCTTGTATTGGGCGCGGTAATGATTCCTACGATGAAAATAAAAACGG  
CTTGCTTGTCTCGATGAGTGCGGTACTTGGTTTAAATCCCGTTTCTTGGAAATGATAAGGAAAAGACAGCCGATT  
TGATTGGTTTCTACATGCTGTAATAGGATGGATATTATTTTCTTGTTCAGGACTTATCTATTGTTGATAAAC  
AGGCGCTTCTGCATTAGCTGAACATGTTGTTTATTGTCGCTGACGAGAACTTACTTTACCTTTTGTCCGTA  
CTTTATATTCTTATTACTGGCTCGAAAATGCCTCTGCCTAAATACATGTTGGCGTTGTTAAATATGGCGATTCT  
CAATTAAGCCCTACTGTTGAGCGTTGGCTTTTACTGGTAAGAATTTGTATAACGCATATGATACTAAACAGGCTT  
TTTCTAGTAATTATGATTCCGGTGTATTCTTATTAAACGCCTTATTATCACACGGTCCGGTATTTCAAACCATTAA  
ATTTAGGTGAGAAGATGAAATTAACATAAAATATATTTGAAAAGTTTTCTCGCGTTCTTTGCTTGGCATTGGATT  
TGCATCAGCATTTACATATAGTTATATAACCCAACCTAAGCCGGAGGTTAAAAAGGTAGTCTCTCAGACCTATGAT  
TTTGATAAATCACTATTGACTCTTCTCAGCGTCTTAATCTAAGCTATCGCTATGTTTTCAAGGATTCTAAGGGAA  
AATTAATTAATAGCGACGATTTACAGAAGCAAGGTTATTCACCTCACATATATTGATTTATGTACTGTTCCATTAAA  
AAAGGTAATTCAAATGAAATGTTAAATGTAATTAATTTGTTTTCTTGATGTTTGTTCATCATCTTCTTTTGTCTC  
AGGTAATGAAATGAATAATTCGCCCTCTGCGCGATTTTGTAACTTGGTATTCAAAGCAATCAGGCGAATCCGTTA  
TTGTTTCTCCCGATGTAAGGTTACTGTTACTGTATATTCTGACGTTAAACCTGAAAATCTACGCAATTTCTTT  
ATTTCTGTTTTACGTGCAAATAATTTGATATGGTAGGTTCTAACCTTCCATTATTCAGAAGTATAATCCAAACAA  
TCAGGATTATATTGATGAATTGCCATCATCTGATAATCAGGAATATGATGATAATTCGGCTCCTTCTGGTGGTTTCT  
TTGTTCCGCAAAATGATAATGTTACTCAAACCTTTTAAAAATTAACGTTCCGGCAAAGGATTTAATACGAGTTG  
TCGAATGTTTTGTAAGTCTAATACTTCTAAATCCTCAAATGATTATCTATTGACGGCTCTAATCTATTAGTTGTTA  
GTGCTCCTAAAGATATTTTATAGATAACCTTCTCAATTCCTTTCAACTGTTGATTTGCCAACTGACCAGATATTGATT  
GAGGGTTTGTATTTGAGGTTTCAGCAAGGTGATGCTTTAGATTTTCTATTGCTGCTGGCTCTCAGCGTGGCAC  
TGTTGCAGGCGGTGTTAATACTGACCGCCTCACCTCTGTTTTATCTTCTGCTGGTGGTTCGTTCCGGTATTTTTAAT  
GGCGATGTTTTAGGGCTATCAGTTCGCGCATTAAAGACTAATAGCCATTCAAATAATTTGCTGTGCCACGATTCT  
TTACGCTTTCAGGTGAGAAGGTTCTATCTCTGTTGGCCAGAATGTCCCTTTTATTACTGGTCTGTGACTGGTG  
AATCTGCCAATGTAATAATCCATTTTACAGCGATTGAGCGTCAAATGTAGGTATTTCCATGAGCGTTTTTCTGT  
TGCAATGGCTGGCGGTAATATTGTTCTGGATATTACCAGCAAGGCCGATAGTTT
